# Supplementary material for: Combined Cohesin–RUNX1 Deficiency Synergistically Perturbs Chromatin Looping and Causes Myelodysplastic Syndromes
Source: Oxford University Press journal article supplement (doi:10.1158/2159-8290.cd-19-0982), 2020-04-05
Supplement: 21598290cd190982-sup-supplementary_tables.xlsx [file 21598290cd190982-sup-supplementary_tables.xlsx]

## Sheet: Inventory
Supplementary Tables
Supplementary Table S1: Diagnosis of patients with MDS/AML in correlation analysis
Supplementary Table S2: Characteristics of MDS patients with STAG2, RUNX1, SRSF2, and/or ASXL1 mutations
Supplementary Table S3: Correlations between mutations in patients with MDS/AML
Supplementary Table S4: The antibodies used in the FACS experiments
Supplementary Table S5: sgRNA sequences used for gene knockout and PCR primers for confirmation
Supplementary Table S6: Genotypes of CRISPR-KO HL-60 clones
Supplementary Table S7: Mutations in human MDS/AML RNA-seq datasets
Supplementary Table S8: Up-regulated genes in RNA-seq of SKO LSK cells (vs WT, edgeR; FDR < 0.05)
Supplementary Table S9: Down-regulated genes in RNA-seq of SKO LSK cells (vs WT, edgeR; FDR < 0.05)
Supplementary Table S10: Up-regulated genes in RNA-seq of SKO LSK cells in BMT experiments (vs WT, edgeR; FDR < 0.05)
Supplementary Table S11: Down-regulated genes in RNA-seq of SKO LSK cells in BMT experiments (vs WT, edgeR; FDR < 0.05)
Supplementary Table S12: Up-regulated genes in RNA-seq of RKO LSK cells in BMT experiments (vs WT, edgeR; FDR < 0.05)
Supplementary Table S13: Down-regulated genes in RNA-seq of RKO LSK cells in BMT experiments (vs WT, edgeR; FDR < 0.05)
Supplementary Table S14: Up-regulated genes in RNA-seq of DKO LSK cells in BMT experiments (vs WT, edgeR; FDR < 0.05)
Supplementary Table S15: Down-regulated genes in RNA-seq of DKO LSK cells in BMT experiments (vs WT, edgeR; FDR < 0.05)
Supplementary Table S16: Gained peaks in ATAC-seq of SKO LSK cells (vs WT, edgeR; FDR < 0.05)
Supplementary Table S17: Lost peaks in ATAC-seq of SKO LSK cells (vs WT, edgeR; FDR < 0.05)
Supplementary Table S18: Gained peaks in ATAC-seq of SKO CMP cells (vs WT, edgeR; FDR < 0.05)
Supplementary Table S19: Lost peaks in ATAC-seq of SKO CMP cells (vs WT, edgeR; FDR < 0.05)
Supplementary Table S20: Super-enhancers of mouse HSPCs identified using H3K27ac ChIP-seq of WT HSPCs
Supplementary Table S21: Information about the external ChIP-seq datasets used in this study

## Sheet: ST1
Supplementary Table S1: Diagnosis of patients with MDS/AML in correlation analysis
Diagnosis			Haferlach et al Leukemia 2014 (n = 889)	Yoshizato et al Blood 2018 (n = 797)	Makishima et al Nat Genet 2016 (n = 661)	Papaemmanuil et al Blood 2013 (n = 562)	Lindsley et al Blood 2015 (n = 93)	Meggendorfer Haematologica 2015 (n = 38)	Walter et al NEJM 2012 (n = 7)	Total (n = 3,047)
MDS			889	525	468	533	0	0	0	2415
	low-risk MDS		526	242	301	380	0	0	0	1449
	high-risk MDS		363	283	167	153	0	0	0	966
	MDS/MPN		0	46	0	0	0	0	0	46
	Not avalilable		0	37	0	0	0	0	0	37
secondary AML			0	189	193	29	93	38	7	549
Mutations
	STAG2		65	24	68	32	13	5	1	208
	RUNX1		90	112	62	50	29	14	1	358
	SRSF2		149	42	57	82	19	18	0	367
	ASXL1		206	105	84	83	30	16	0	524

## Sheet: ST2
Supplementary Table S2: Characteristics of MDS patients with STAG2, RUNX1, SRSF2, and/or ASXL1 mutations
Presence of mutations in STAG2, RUNX1, SRSF2, or ASXL1											Number of mutations in STAG2, RUNX1, SRSF2, and/or ASXL1
		STAG2, RUNX1, SRSF2, or ASXL1 mutations (-) (n = 611)			STAG2, RUNX1, SRSF2, or ASXL1 mutations (+) (n = 334)								Number of mutations in STAG2, RUNX1, SRSF2, and/or ASXL1 = 1 (n = 183)			Number of mutations in STAG2, RUNX1, SRSF2, and/or ASXL1 >= 2 (n = 151)
		No. of patients	%		No. of patients	%			P				No. of patients	%		No. of patients	%			P
Age, median (range, years)		72.3 (69.2 - 71.0)			73.7 (71.5 - 73.4)				0.0007		Age, median (range, years)		74.4 (72.1 - 74.5)			72.2 (70.0 - 73.1)				0.081
Sex (n = 945)									0.001		Sex (n = 334)									1
	Male	352	57.6105		229	68.5629						Male	125	68.306		104	68.8742
	Female	259	42.3895		105	31.4371						Female	58	31.694		47	31.1258
MDS subtypes (WHO 2008, n = 945)								<	0.0001		MDS subtypes (WHO 2008, n = 334)								<	0.0001
	RA	35	5.72831		6	1.79641						RA	5	2.73224		1	0.662252
	RARS	69	11.293		12	3.59281						RARS	11	6.01093		1	0.662252
	RARS-T	25	4.09165		3	0.898204						RARS-T	1	0.546448		2	1.3245
	RCMD	136	22.2586		59	17.6647						RCMD	40	21.8579		19	12.5828
	RCMD-RS	141	23.0769		43	12.8743						RCMD-RS	29	15.847		14	9.27152
	RAEB-1	108	17.6759		83	24.8503						RAEB-1	42	22.9508		41	27.1523
	RAEB-2	64	10.4746		124	37.1257						RAEB-2	51	27.8689		73	48.3444
	5q-	33	5.40098		4	1.1976						5q-	4	2.18579		0	0
IPSS-R (n = 848)								<	0.0001		IPSS-R (n = 306)								<	0.0001
	Very low	100	18.4502		22	7.18954						Very low	17	10.303		5	3.5461
	Low	252	46.4945		77	25.1634						Low	53	32.1212		24	17.0213
	Int	108	19.9262		107	34.9673						Int	64	38.7879		43	30.4965
	High	47	8.67159		83	27.1242						High	24	14.5455		59	41.844
	Very high	35	6.45756		17	5.55556						Very high	7	4.24242		10	7.0922
Transform to AML (n = 831)								<	0.0001		Transform to AML (n = 305)								<	0.0001
	(-)	499	94.8669		240	78.6885						(-)	144	88.8889		96	67.1329
	(+)	27	5.13308		65	21.3115						(+)	18	11.1111		47	32.8671
Neutropenia (n = 855)									0.055		Neutropenia (n = 309)									0.79
	(-)	535	97.9853		295	95.4693						(-)	160	95.8084		135	95.0704
	(+)	11	2.01465		14	4.53074						(+)	7	4.19162		7	4.92958
Anemia (n = 857)									0.23		Anemia (n = 309)									0.068
	(-)	299	54.562		155	50.1618						(-)	92	55.0898		63	44.3662
	(+)	249	45.438		154	49.8382						(+)	75	44.9102		79	55.6338
Thrombocytopenia (n = 855)								<	0.0001		Thrombocytopenia (n = 308)									0.0004
	(-)	417	76.234		157	50.974						(-)	100	60.6061		57	39.8601
	(+)	130	23.766		151	49.026						(+)	65	39.3939		86	60.1399

## Sheet: ST3
Supplementary Table S3: Correlations between mutations in patients with MDS/AML
Gene1	Gene2	co.occurence	gene1ocurence	gene2occurence	intact	pvalue	odds	pearson	qvalue
ASXL1	BCOR	45	479	126	2397	0.0023056	1.78721	0.058922	0.0178056
ASXL1	BCORL1	4	391	37	1922	0.292953	0.531416	-0.0250248	0.584408
ASXL1	CBL	49	475	90	2433	1.95084e-07	2.7887	0.104603	4.47546e-06
ASXL1	CEBPA	16	508	22	2501	0.00025073	3.58053	0.0741768	0.00253886
ASXL1	CSF3R	3	164	12	1109	0.429606	1.69055	0.02273	0.719082
ASXL1	CUX1	11	254	37	1696	0.0530148	1.9851	0.0446537	0.19825
ASXL1	DDX41	6	175	34	1210	0.629689	1.22017	0.0117292	0.914588
ASXL1	DNMT3A	30	494	307	2216	7.70873e-06	0.438355	-0.0775182	0.000117898
ASXL1	EED	1	74	2	504	0.33993	3.40541	0.0438853	0.63432
ASXL1	ETV6	38	456	63	2397	3.76764e-07	3.17063	0.105378	8.16322e-06
ASXL1	EZH2	76	448	81	2442	1.28065e-20	5.11442	0.192774	1.10989e-18
ASXL1	FLT3	19	505	82	2441	0.687096	1.12	0.0079226	0.953306
ASXL1	GATA2	18	506	51	2472	0.0531637	1.72425	0.035859	0.19825
ASXL1	IDH1	22	502	63	2460	0.0401623	1.71125	0.0389889	0.166631
ASXL1	IDH2	41	483	76	2447	2.0587e-06	2.73311	0.0945009	3.64952e-05
ASXL1	JAK2	19	473	63	2371	0.132904	1.51176	0.0288573	0.356237
ASXL1	KDM6A	8	470	39	2399	0.843716	1.04703	0.00217451	1
ASXL1	KIT	12	512	21	2502	0.0082515	2.79241	0.0531464	0.0498928
ASXL1	KRAS	25	499	48	2475	0.000395107	2.58329	0.0707859	0.00362569
ASXL1	NF1	27	472	74	2379	0.0100955	1.83901	0.0493609	0.0583294
ASXL1	NPM1	4	520	74	2449	0.00213128	0.254574	-0.0518398	0.0167919
ASXL1	NRAS	54	470	111	2412	6.30459e-07	2.49661	0.0984726	1.2941e-05
ASXL1	PHF6	39	485	53	2470	7.17991e-09	3.74752	0.117804	1.93115e-07
ASXL1	PRPF8	10	375	52	1849	1	0.948205	-0.00317934	1
ASXL1	PTPN11	18	506	46	2477	0.0279426	1.91554	0.0424173	0.128207
ASXL1	RAD21	9	515	31	2491	0.396786	1.40426	0.0161907	0.691896
ASXL1	RUNX1	146	378	212	2311	8.02287e-30	4.21042	0.228049	6.25784e-27
ASXL1	SETBP1	24	211	49	1312	5.61104e-05	3.04556	0.112154	0.0006843
ASXL1	SF3B1	49	475	532	1991	4.19904e-11	0.386066	-0.112724	1.72381e-09
ASXL1	SMC3	7	432	29	1990	0.826063	1.11191	0.00504324	1
ASXL1	SRSF2	139	385	228	2295	1.78653e-24	3.63414	0.202773	2.78698e-22
ASXL1	STAG2	103	421	105	2418	3.99269e-29	5.63407	0.231844	1.0381e-26
ASXL1	SUZ12	3	72	13	494	0.447178	1.58333	0.0294232	0.730206
ASXL1	TET2	147	377	484	2039	1.08107e-05	1.64266	0.0826002	0.000162161
ASXL1	TP53	15	509	259	2264	2.45214e-09	0.257603	-0.0976516	7.65069e-08
ASXL1	U2AF1	108	416	199	2324	8.50775e-16	3.03189	0.159506	4.42403e-14
ASXL1	U2AF2	17	455	12	2356	3.16721e-07	7.33553	0.1146	7.05835e-06
ASXL1	WT1	5	519	48	2475	0.144902	0.496749	-0.0273719	0.380551
ASXL1	ZRSR2	40	484	105	2418	0.00143963	1.90319	0.0615397	0.0120743
BCOR	BCORL1	8	126	33	2187	0.00172905	4.20779	0.0794113	0.0139037
BCOR	CBL	11	160	128	2748	0.253197	1.47598	0.0218634	0.5396
BCOR	CEBPA	4	167	34	2842	0.161508	2.00211	0.0239948	0.408854
BCOR	CSF3R	1	83	14	1190	1	1.0241	0.000637155	1
BCOR	CUX1	7	116	41	1834	0.025123	2.69933	0.0550082	0.118048
BCOR	DDX41	0	94	40	1291	0.106118	0.168724	-0.0451627	0.311247
BCOR	DNMT3A	38	133	299	2577	1.34754e-05	2.46249	0.086781	0.000194645
BCOR	EED	2	34	1	544	0.0107781	32	0.180703	0.0613646
BCOR	ETV6	17	147	84	2706	2.68049e-05	3.72546	0.0926832	0.00036048
BCOR	EZH2	13	158	144	2732	0.151039	1.56101	0.0270206	0.390102
BCOR	FLT3	9	162	92	2784	0.180148	1.68116	0.0265388	0.447502
BCOR	GATA2	9	162	60	2816	0.0137448	2.60741	0.0491488	0.0754998
BCOR	IDH1	7	164	78	2798	0.331541	1.53111	0.0193077	0.623137
BCOR	IDH2	14	157	103	2773	0.00612757	2.40072	0.0551656	0.0393681
BCOR	JAK2	1	161	81	2683	0.0873999	0.205736	-0.0320537	0.282076
BCOR	KDM6A	4	158	43	2711	0.329717	1.59611	0.0165121	0.621206
BCOR	KIT	1	170	32	2844	1	0.522794	-0.0117377	1
BCOR	KRAS	10	161	63	2813	0.00678969	2.77334	0.0550471	0.0426815
BCOR	NF1	11	152	90	2699	0.024626	2.17025	0.0442473	0.116893
BCOR	NPM1	9	162	69	2807	0.0391436	2.26006	0.0417361	0.163432
BCOR	NRAS	25	146	140	2736	2.77984e-06	3.34638	0.099174	4.71364e-05
BCOR	PHF6	8	163	84	2792	0.242906	1.63132	0.0236401	0.527761
BCOR	PRPF8	2	125	60	2099	0.579136	0.559733	-0.0169819	0.877138
BCOR	PTPN11	5	166	59	2817	0.405253	1.43813	0.0140039	0.696249
BCOR	RAD21	6	165	34	2841	0.0223899	3.0385	0.0470362	0.107803
BCOR	RUNX1	60	111	298	2578	1.0937e-16	4.67622	0.17673	7.10903e-15
BCOR	SETBP1	4	104	69	1419	0.813939	0.79097	-0.0112219	1
BCOR	SF3B1	19	152	562	2314	0.00494258	0.51468	-0.0493891	0.0347317
BCOR	SMC3	4	137	32	2285	0.148162	2.08485	0.0281793	0.384232
BCOR	SRSF2	29	142	338	2538	0.0520045	1.5335	0.036817	0.195959
BCOR	STAG2	37	134	171	2705	5.76151e-11	4.36785	0.143201	2.24699e-09
BCOR	SUZ12	2	34	14	532	0.259793	2.23529	0.0440719	0.543268
BCOR	TET2	33	138	598	2278	0.698133	0.910935	-0.00848851	0.963794
BCOR	TP53	12	159	262	2614	0.410425	0.752989	-0.0168334	0.702042
BCOR	U2AF1	41	130	266	2610	4.76671e-08	3.09456	0.112611	1.19937e-06
BCOR	U2AF2	3	152	26	2659	0.208415	2.01847	0.0218524	0.485486
BCOR	WT1	5	166	48	2828	0.219378	1.7746	0.0220938	0.501803
BCOR	ZRSR2	5	166	140	2736	0.35211	0.58864	-0.0210152	0.652366
BCORL1	CBL	3	38	108	2205	0.440129	1.61184	0.0163415	0.726052
BCORL1	CEBPA	1	40	32	2281	0.44225	1.78203	0.0117452	0.726052
BCORL1	CSF3R	0	25	15	1248	1	1.57938	-0.0152721	1
BCORL1	CUX1	0	31	32	1373	1	0.670818	-0.0224251	1
BCORL1	DDX41	0	29	40	1356	1	0.567692	-0.0244941	1
BCORL1	DNMT3A	3	38	240	2073	0.794185	0.681908	-0.0131529	1
BCORL1	EED	0	19	3	559	1	4.0989	-0.0132466	1
BCORL1	ETV6	4	37	84	2229	0.0644954	2.86873	0.0422353	0.223584
BCORL1	EZH2	2	39	113	2200	1	0.998412	-4.47963e-05	1
BCORL1	FLT3	1	40	62	2251	1	0.907661	-0.00195737	1
BCORL1	GATA2	1	40	56	2257	1	1.00759	0.000152564	1
BCORL1	IDH1	4	37	55	2258	0.0180603	4.43833	0.0617468	0.091474
BCORL1	IDH2	2	39	71	2242	0.365305	1.61936	0.0136477	0.672024
BCORL1	JAK2	0	40	55	2231	1	0.496385	-0.0205857	1
BCORL1	KDM6A	2	39	31	2282	0.111414	3.77502	0.0393657	0.316011
BCORL1	KIT	1	40	16	2297	0.258981	3.58906	0.0269953	0.543268
BCORL1	KRAS	0	41	56	2257	0.624332	0.481395	-0.0207837	0.913939
BCORL1	NF1	2	34	71	2190	0.318233	1.81442	0.0171022	0.604386
BCORL1	NPM1	1	40	62	2251	1	0.907661	-0.00195737	1
BCORL1	NRAS	5	36	112	2201	0.0498712	2.72941	0.0442603	0.191623
BCORL1	PHF6	3	38	66	2247	0.116696	2.6878	0.0346179	0.325398
BCORL1	PRPF8	4	30	58	2194	0.01237	5.04368	0.0684761	0.0689184
BCORL1	PTPN11	0	41	54	2259	1	0.499503	-0.0204003	1
BCORL1	RAD21	3	38	28	2284	0.0157389	6.43985	0.0700698	0.0846646
BCORL1	RUNX1	8	33	257	2056	0.127032	1.93939	0.0347715	0.344044
BCORL1	SETBP1	2	33	64	1366	0.669383	1.29356	0.00912029	0.941689
BCORL1	SF3B1	8	33	391	1922	0.673755	1.19166	0.00909253	0.941808
BCORL1	SMC3	1	39	32	2255	0.437966	1.80689	0.0121008	0.725293
BCORL1	SRSF2	2	39	246	2067	0.309833	0.430894	-0.0245334	0.595246
BCORL1	STAG2	4	37	154	2159	0.351175	1.51562	0.0161967	0.652182
BCORL1	SUZ12	2	17	14	549	0.0922883	4.61345	0.0873774	0.291437
BCORL1	TET2	16	25	441	1872	0.00410407	2.71673	0.0660101	0.0299176
BCORL1	TP53	3	38	220	2093	1	0.751077	-0.00980276	1
BCORL1	U2AF1	9	32	237	2076	0.0328484	2.46361	0.0500542	0.143943
BCORL1	U2AF2	1	34	24	2219	0.322374	2.71936	0.0210988	0.608842
BCORL1	WT1	0	41	42	2271	1	0.64394	-0.0179446	1
BCORL1	ZRSR2	0	41	112	2201	0.260964	0.23577	-0.0297574	0.544256
CBL	CEBPA	3	136	35	2873	0.249386	1.81071	0.0179501	0.537202
CBL	CSF3R	3	60	12	1213	0.0333064	5.05417	0.0760389	0.145134
CBL	CUX1	1	85	47	1865	0.720578	0.466834	-0.0171691	0.97482
CBL	DDX41	0	66	40	1319	0.255912	0.244964	-0.0374513	0.540953
CBL	DNMT3A	11	128	326	2582	0.268351	0.680646	-0.0219329	0.55374
CBL	EED	0	18	3	560	1	4.32819	-0.0128819	1
CBL	ETV6	9	125	92	2728	0.0459785	2.13496	0.0395538	0.183914
CBL	EZH2	11	128	146	2762	0.16388	1.62575	0.0273061	0.411017
CBL	FLT3	5	134	96	2812	0.806658	1.09297	0.00344865	1
CBL	GATA2	4	135	65	2843	0.554995	1.29595	0.00901115	0.848816
CBL	IDH1	4	135	81	2827	0.794526	1.03411	0.00116924	1
CBL	IDH2	9	130	108	2800	0.109329	1.79487	0.0299801	0.314098
CBL	JAK2	5	129	77	2715	0.423812	1.36666	0.0123299	0.711776
CBL	KDM6A	1	129	46	2740	0.721899	0.461746	-0.014453	0.97482
CBL	KIT	3	136	30	2878	0.188764	2.11618	0.0227122	0.46128
CBL	KRAS	5	134	68	2840	0.383619	1.55838	0.0171755	0.690886
CBL	NF1	11	123	90	2728	0.00533428	2.71075	0.0574317	0.03681
CBL	NPM1	3	136	75	2833	1	0.833235	-0.00555965	1
CBL	NRAS	13	126	152	2756	0.0513574	1.87072	0.0380363	0.195647
CBL	PHF6	7	132	85	2823	0.194689	1.76123	0.0257651	0.468897
CBL	PRPF8	4	105	58	2119	0.536813	1.39179	0.0131906	0.827498
CBL	PTPN11	5	134	59	2849	0.214024	1.8018	0.0228192	0.492601
CBL	RAD21	1	138	39	2868	1	0.532887	-0.0114054	1
CBL	RUNX1	29	110	329	2579	0.00166155	2.06662	0.061881	0.0136422
CBL	SETBP1	14	63	59	1460	4.29346e-06	5.49906	0.146649	6.83449e-05
CBL	SF3B1	20	119	561	2347	0.184009	0.703126	-0.0260431	0.452768
CBL	SMC3	3	117	33	2305	0.255742	1.79099	0.0195262	0.540953
CBL	SRSF2	30	109	337	2571	0.00115878	2.09975	0.0640684	0.00982447
CBL	STAG2	8	131	200	2708	0.731625	0.82687	-0.00928441	0.97717
CBL	SUZ12	0	18	16	548	1	0.898444	-0.0300364	1
CBL	TET2	49	90	582	2326	5.846e-05	2.17591	0.078464	0.00070152
CBL	TP53	11	128	263	2645	0.762102	0.864276	-0.00824454	1
CBL	U2AF1	28	111	279	2629	0.000239385	2.37696	0.0731305	0.00245685
CBL	U2AF2	1	128	28	2683	1	0.748605	-0.00533624	1
CBL	WT1	3	136	50	2858	0.733168	1.26088	0.00700463	0.977557
CBL	ZRSR2	7	132	138	2770	0.837616	1.06445	0.00284663	1
CEBPA	CSF3R	0	21	15	1252	1	1.87922	-0.013975	1
CEBPA	CUX1	0	24	48	1926	1	0.810646	-0.0172996	1
CEBPA	DDX41	1	21	39	1364	0.467997	1.66545	0.0131796	0.752656
CEBPA	DNMT3A	7	31	330	2679	0.18459	1.83314	0.0263749	0.452768
CEBPA	EED	0	8	3	570	1	9.58824	-0.00851264	1
CEBPA	ETV6	0	35	101	2818	0.631559	0.391105	-0.0206028	0.914588
CEBPA	EZH2	2	36	155	2854	1	1.02294	0.000561964	1
CEBPA	FLT3	3	35	98	2911	0.129728	2.54606	0.0287503	0.35013
CEBPA	GATA2	2	36	67	2942	0.212124	2.43947	0.0226511	0.49243
CEBPA	IDH1	3	35	82	2927	0.0878775	3.05958	0.0348382	0.282076
CEBPA	IDH2	4	34	113	2896	0.0558155	3.0151	0.0391042	0.204427
CEBPA	JAK2	2	33	80	2811	0.256964	2.12955	0.0194123	0.541709
CEBPA	KDM6A	2	33	45	2836	0.1082	3.81953	0.0359073	0.313739
CEBPA	KIT	0	38	33	2976	1	1.15391	-0.0117589	1
CEBPA	KRAS	0	38	73	2936	1	0.518862	-0.0176064	1
CEBPA	NF1	3	33	98	2818	0.123352	2.6141	0.0300238	0.337595
CEBPA	NPM1	2	36	76	2933	0.253941	2.14401	0.0192349	0.539711
CEBPA	NRAS	2	36	163	2846	1	0.970007	-0.000754781	1
CEBPA	PHF6	1	37	91	2918	1	0.866647	-0.00254666	1
CEBPA	PRPF8	2	29	60	2195	0.204631	2.52299	0.0269916	0.483923
CEBPA	PTPN11	2	36	62	2947	0.189243	2.64068	0.0247856	0.46128
CEBPA	RAD21	1	37	39	2969	0.396746	2.05752	0.0130167	0.691896
CEBPA	RUNX1	12	26	346	2663	0.000899189	3.55225	0.0692041	0.00770734
CEBPA	SETBP1	0	27	73	1496	0.632004	0.370192	-0.0287198	0.914588
CEBPA	SF3B1	0	38	581	2428	0.000548872	0.0542373	-0.0545472	0.00497814
CEBPA	SMC3	1	35	35	2387	0.414333	1.94857	0.0133269	0.704941
CEBPA	SRSF2	14	24	353	2656	6.7037e-05	4.38905	0.085617	0.000768954
CEBPA	STAG2	14	24	194	2815	6.937e-08	8.46435	0.133748	1.69089e-06
CEBPA	SUZ12	2	6	14	560	0.0180335	13.3333	0.160654	0.091474
CEBPA	TET2	14	24	617	2392	0.0240757	2.26148	0.0447415	0.115209
CEBPA	TP53	3	35	271	2738	1	0.865999	-0.00431214	1
CEBPA	U2AF1	1	37	306	2703	0.172777	0.238739	-0.0277913	0.431943
CEBPA	U2AF2	1	33	28	2778	0.296032	3.00649	0.0210231	0.585174
CEBPA	WT1	1	37	52	2957	0.488758	1.5369	0.00766891	0.776399
CEBPA	ZRSR2	2	36	143	2866	0.701925	1.11344	0.00266242	0.967317
CSF3R	CUX1	0	15	28	1245	1	1.40973	-0.0161817	1
CSF3R	DDX41	0	15	39	1234	1	1.00817	-0.0191815	1
CSF3R	DNMT3A	0	15	110	1163	0.631328	0.339658	-0.0331707	0.914588
CSF3R	EED	0	1	2	488	1	65.1333	-0.0028891	1
CSF3R	ETV6	0	15	63	1210	1	0.614935	-0.0246169	1
CSF3R	EZH2	1	14	59	1214	0.513039	1.46973	0.0103442	0.800341
CSF3R	FLT3	2	13	45	1228	0.101227	4.19829	0.0560634	0.308425
CSF3R	GATA2	1	14	44	1229	0.41516	1.99513	0.0187568	0.704941
CSF3R	IDH1	0	15	29	1244	1	1.36085	-0.0164747	1
CSF3R	IDH2	0	15	35	1238	1	1.1254	-0.0181422	1
CSF3R	JAK2	0	15	28	1245	1	1.40973	-0.0161817	1
CSF3R	KDM6A	0	15	20	1253	1	1.97246	-0.0136329	1
CSF3R	KIT	0	15	7	1266	1	5.44731	-0.00802428	1
CSF3R	KRAS	1	14	29	1244	0.299157	3.06404	0.0312164	0.585971
CSF3R	NF1	0	15	40	1233	1	0.982477	-0.0194336	1
CSF3R	NPM1	0	15	49	1224	1	0.79798	-0.0215871	1
CSF3R	NRAS	2	13	76	1197	0.22905	2.42308	0.0331196	0.509752
CSF3R	PHF6	1	14	40	1233	0.386117	2.20179	0.0215392	0.69177
CSF3R	PRPF8	0	15	43	1230	1	0.912495	-0.0201735	1
CSF3R	PTPN11	0	15	38	1235	1	1.03519	-0.0189264	1
CSF3R	RAD21	0	15	15	1258	1	2.61915	-0.0117832	1
CSF3R	RUNX1	4	11	156	1117	0.104687	2.60373	0.0468785	0.311247
CSF3R	SETBP1	2	13	60	1213	0.160286	3.11026	0.0432045	0.408854
CSF3R	SF3B1	0	15	102	1171	0.623966	0.368686	-0.0318339	0.913939
CSF3R	SMC3	0	15	14	1259	1	2.802	-0.0113792	1
CSF3R	SRSF2	1	14	80	1193	1	1.06518	0.00168953	1
CSF3R	STAG2	0	15	79	1194	1	0.484682	-0.027748	1
CSF3R	SUZ12	0	1	13	477	1	11.7901	-0.00745006	1
CSF3R	TET2	3	12	130	1143	0.195908	2.19808	0.034509	0.47018
CSF3R	TP53	0	15	139	1134	0.393111	0.262342	-0.0377554	0.691896
CSF3R	U2AF1	3	12	156	1117	0.416638	1.79006	0.0252617	0.704941
CSF3R	U2AF2	1	14	17	1256	0.191254	5.27731	0.0487248	0.464381
CSF3R	WT1	2	13	32	1241	0.0572986	5.96635	0.0724073	0.207874
CSF3R	ZRSR2	0	15	37	1236	1	1.06366	-0.0186683	1
CUX1	DDX41	2	30	38	1355	0.225749	2.37719	0.0315932	0.509393
CUX1	DNMT3A	2	46	193	1757	0.318465	0.39581	-0.0295689	0.604386
CUX1	EED	1	12	2	537	0.0691237	22.375	0.15101	0.236476
CUX1	ETV6	1	47	77	1873	1	0.517546	-0.0147472	1
CUX1	EZH2	3	45	96	1854	0.512857	1.2875	0.00936275	0.800341
CUX1	FLT3	2	46	63	1887	0.668275	1.30228	0.00807781	0.941689
CUX1	GATA2	3	45	55	1895	0.16082	2.29697	0.031279	0.408854
CUX1	IDH1	1	47	49	1901	1	0.825445	-0.00421026	1
CUX1	IDH2	3	45	66	1884	0.228785	1.90303	0.0240287	0.509752
CUX1	JAK2	2	45	57	1866	0.649947	1.45497	0.0115605	0.928496
CUX1	KDM6A	4	44	34	1916	0.0118861	5.12299	0.0738731	0.0666992
CUX1	KIT	0	48	23	1927	1	0.84558	-0.016931	1
CUX1	KRAS	0	48	37	1913	1	0.526048	-0.0215509	1
CUX1	NF1	2	45	65	1858	0.673003	1.27043	0.00736853	0.941808
CUX1	NPM1	2	46	60	1890	0.659361	1.36957	0.00962307	0.932562
CUX1	NRAS	3	45	97	1853	0.731218	1.27354	0.00895815	0.97717
CUX1	PHF6	4	44	57	1893	0.056238	3.01914	0.0481533	0.20498
CUX1	PRPF8	3	28	48	1318	0.10056	2.94196	0.0484091	0.308229
CUX1	PTPN11	1	47	47	1903	1	0.861476	-0.00326923	1
CUX1	RAD21	1	47	24	1925	0.457719	1.70656	0.0117357	0.741512
CUX1	RUNX1	5	43	219	1731	1	0.919083	-0.00395108	1
CUX1	SETBP1	1	31	65	1339	1	0.664516	-0.0106061	1
CUX1	SF3B1	5	43	274	1676	0.672131	0.711254	-0.0160567	0.941808
CUX1	SMC3	0	31	18	1360	1	1.16731	-0.017062	1
CUX1	SRSF2	12	36	163	1787	0.00058836	3.6544	0.0901375	0.00527495
CUX1	STAG2	6	42	116	1834	0.0684289	2.25862	0.0418955	0.23513
CUX1	SUZ12	1	12	15	525	0.320193	2.91667	0.0444225	0.606191
CUX1	TET2	11	37	289	1661	0.148274	1.70869	0.0347046	0.384232
CUX1	TP53	4	44	189	1761	1	0.847042	-0.0070442	1
CUX1	U2AF1	5	43	213	1737	1	0.948248	-0.00248715	1
CUX1	U2AF2	0	44	22	1856	1	0.927091	-0.0164707	1
CUX1	WT1	1	47	45	1905	1	0.900709	-0.00229067	1
CUX1	ZRSR2	0	48	64	1886	0.402739	0.301526	-0.0285407	0.693458
DDX41	DNMT3A	4	36	119	1266	0.772223	1.18207	0.00828098	1
DDX41	EED	0	11	3	538	1	6.68944	-0.0105408	1
DDX41	ETV6	1	39	67	1318	1	0.504401	-0.0181122	1
DDX41	EZH2	2	38	65	1320	0.712041	1.06883	0.00239446	0.97482
DDX41	FLT3	3	37	50	1335	0.183582	2.16486	0.0339529	0.452768
DDX41	GATA2	3	37	47	1338	0.162493	2.30822	0.036863	0.408854
DDX41	IDH1	0	40	35	1350	0.622106	0.469657	-0.0269669	0.913939
DDX41	IDH2	0	40	41	1344	0.626927	0.39997	-0.0292502	0.914025
DDX41	JAK2	3	37	29	1328	0.0607577	3.71295	0.0597834	0.214439
DDX41	KDM6A	1	39	23	1362	0.497911	1.51839	0.0107739	0.785647
DDX41	KIT	1	39	8	1377	0.226614	4.41346	0.0400813	0.509393
DDX41	KRAS	2	38	30	1355	0.225749	2.37719	0.0315932	0.509393
DDX41	NF1	2	38	43	1314	0.372091	1.60832	0.017297	0.678109
DDX41	NPM1	0	40	53	1332	0.398469	0.307488	-0.0334015	0.691896
DDX41	NRAS	1	39	82	1303	0.726296	0.407442	-0.0241234	0.976742
DDX41	PHF6	3	37	43	1342	0.135704	2.53048	0.0410755	0.361259
DDX41	PRPF8	1	39	50	1307	1	0.670256	-0.0105338	1
DDX41	PTPN11	1	39	41	1344	1	0.840525	-0.00449521	1
DDX41	RAD21	0	40	18	1366	1	0.911912	-0.0192356	1
DDX41	RUNX1	2	38	171	1214	0.219193	0.373653	-0.0371547	0.501803
DDX41	SETBP1	1	39	64	1321	1	0.529247	-0.0167902	1
DDX41	SF3B1	1	39	113	1272	0.366414	0.288632	-0.0344531	0.672478
DDX41	SMC3	0	40	17	1341	1	0.946384	-0.0190418	1
DDX41	SRSF2	2	38	91	1294	1	0.748409	-0.010502	1
DDX41	STAG2	1	39	88	1297	0.51016	0.377914	-0.0263054	0.799627
DDX41	SUZ12	0	11	16	525	1	1.38472	-0.0246363	1
DDX41	TET2	2	38	153	1232	0.306304	0.423805	-0.0320791	0.591975
DDX41	TP53	4	36	155	1230	1	0.88172	-0.00624991	1
DDX41	U2AF1	1	39	175	1210	0.0517782	0.177289	-0.0508812	0.195959
DDX41	U2AF2	1	38	17	1304	0.409669	2.01858	0.0186522	0.702042
DDX41	WT1	4	36	34	1351	0.0197336	4.41503	0.0773555	0.098668
DDX41	ZRSR2	0	40	38	1347	0.623313	0.432099	-0.0281293	0.913939
DNMT3A	EED	0	51	3	527	1	1.46325	-0.0223483	1
DNMT3A	ETV6	8	311	93	2542	0.416081	0.703108	-0.0174479	0.704941
DNMT3A	EZH2	14	323	143	2567	0.434561	0.778064	-0.0159246	0.7219
DNMT3A	FLT3	19	318	82	2628	0.0221126	1.91486	0.0457637	0.10713
DNMT3A	GATA2	8	329	61	2649	0.845973	1.05596	0.00259235	1
DNMT3A	IDH1	19	318	66	2644	0.00227148	2.39356	0.060995	0.0177176
DNMT3A	IDH2	23	314	94	2616	0.00601679	2.03849	0.0547813	0.0391092
DNMT3A	JAK2	7	307	75	2537	0.716122	0.771292	-0.0120409	0.97482
DNMT3A	KDM6A	5	310	42	2559	1	0.982719	-0.000676929	1
DNMT3A	KIT	3	334	30	2680	1	0.802395	-0.00656957	1
DNMT3A	KRAS	9	328	64	2646	0.704986	1.13443	0.00633761	0.968115
DNMT3A	NF1	12	313	89	2538	0.746296	1.0933	0.00524174	0.986629
DNMT3A	NPM1	24	313	54	2656	1.44783e-06	3.77139	0.101855	2.68882e-05
DNMT3A	NRAS	22	315	143	2567	0.370346	1.25372	0.0173428	0.67651
DNMT3A	PHF6	8	329	84	2626	0.611583	0.760168	-0.0133018	0.913859
DNMT3A	PRPF8	7	228	55	1996	0.830972	1.11419	0.00555473	1
DNMT3A	PTPN11	7	330	57	2653	1	0.987294	-0.000572376	1
DNMT3A	RAD21	4	333	36	2673	1	0.891892	-0.00391166	1
DNMT3A	RUNX1	33	304	325	2385	0.281292	0.796609	-0.0214314	0.572865
DNMT3A	SETBP1	2	146	71	1377	0.0592578	0.265676	-0.0493142	0.212023
DNMT3A	SF3B1	104	233	477	2233	3.82933e-08	2.08953	0.105859	9.95625e-07
DNMT3A	SMC3	7	253	29	2169	0.0958358	2.06937	0.0351487	0.300209
DNMT3A	SRSF2	19	318	348	2362	5.61477e-05	0.405534	-0.0694118	0.0006843
DNMT3A	STAG2	21	316	187	2523	0.731481	0.896619	-0.00831871	0.97717
DNMT3A	SUZ12	2	49	14	517	0.64271	1.50729	0.0222218	0.923229
DNMT3A	TET2	77	260	554	2156	0.318269	1.15254	0.0186212	0.604386
DNMT3A	TP53	24	313	250	2460	0.226053	0.754505	-0.023061	0.509393
DNMT3A	U2AF1	32	305	275	2435	0.773776	0.929001	-0.00679419	1
DNMT3A	U2AF2	2	306	27	2505	0.763209	0.606391	-0.0128977	1
DNMT3A	WT1	5	332	48	2662	1	0.835216	-0.00689813	1
DNMT3A	ZRSR2	4	333	141	2569	0.000336634	0.218857	-0.0591645	0.00318331
EED	ETV6	1	2	21	557	0.109532	13.2619	0.111523	0.314098
EED	EZH2	0	3	24	554	1	3.23324	-0.0149546	1
EED	FLT3	0	3	11	567	1	7.04969	-0.0100082	1
EED	GATA2	0	3	8	570	1	9.58824	-0.00851264	1
EED	IDH1	0	3	24	554	1	3.23324	-0.0149546	1
EED	IDH2	0	3	22	556	1	3.53333	-0.0142923	1
EED	JAK2	0	3	19	559	1	4.0989	-0.0132466	1
EED	KDM6A	1	2	10	568	0.0558244	28.4	0.166197	0.204427
EED	KIT	0	3	3	575	1	23.4898	-0.00519031	1
EED	KRAS	0	3	7	571	1	10.8857	-0.00795591	1
EED	NF1	1	2	18	531	0.0999223	14.75	0.121204	0.308061
EED	NPM1	0	3	31	547	1	2.48299	-0.0171039	1
EED	NRAS	0	3	24	554	1	3.23324	-0.0149546	1
EED	PHF6	0	3	18	560	1	4.32819	-0.0128819	1
EED	PRPF8	2	1	19	530	0.00404726	55.7895	0.242911	0.0297817
EED	PTPN11	0	3	19	559	1	4.0989	-0.0132466	1
EED	RAD21	0	3	14	563	1	5.55172	-0.0113404	1
EED	RUNX1	1	2	52	526	0.249851	5.05769	0.0605805	0.537202
EED	SETBP1	0	3	18	560	1	4.32819	-0.0128819	1
EED	SF3B1	0	3	68	510	1	1.06465	-0.0262296	1
EED	SMC3	0	3	9	569	1	8.56391	-0.00903691	1
EED	SRSF2	0	3	48	530	1	1.56259	-0.0216199	1
EED	STAG2	1	2	62	516	0.291749	4.16129	0.0521106	0.584031
EED	SUZ12	1	2	15	563	0.0804968	18.7667	0.134623	0.269474
EED	TET2	1	2	88	490	0.39332	2.78409	0.0360353	0.691896
EED	TP53	0	3	49	529	1	1.52814	-0.0218645	1
EED	U2AF1	1	2	51	527	0.245572	5.16667	0.0615368	0.532074
EED	U2AF2	0	2	1	541	1	72.2	-0.00260685	1
EED	WT1	0	3	8	570	1	9.58824	-0.00851264	1
EED	ZRSR2	0	3	23	555	1	3.3769	-0.0146266	1
ETV6	EZH2	12	89	137	2716	0.00421413	2.67301	0.0587811	0.0304354
ETV6	FLT3	8	93	75	2778	0.00668004	3.18624	0.0581935	0.0423612
ETV6	GATA2	7	94	60	2793	0.00715567	3.46649	0.0589232	0.0441023
ETV6	IDH1	2	99	73	2780	1	0.769337	-0.00668302	1
ETV6	IDH2	1	100	106	2747	0.26833	0.259151	-0.0265056	0.55374
ETV6	JAK2	2	99	80	2745	1	0.693182	-0.0094203	1
ETV6	KDM6A	3	95	44	2774	0.20851	1.99091	0.0214641	0.485486
ETV6	KIT	0	101	30	2823	0.624131	0.456028	-0.0190582	0.913939
ETV6	KRAS	8	93	58	2795	0.00157116	4.14535	0.0723931	0.0130373
ETV6	NF1	4	94	91	2670	0.566228	1.24854	0.00797602	0.860931
ETV6	NPM1	3	98	70	2783	0.737855	1.21706	0.00604853	0.980454
ETV6	NRAS	10	91	134	2719	0.0294158	2.22979	0.0439167	0.133397
ETV6	PHF6	8	93	79	2774	0.008843	3.02055	0.0553726	0.053058
ETV6	PRPF8	4	84	58	2140	0.298812	1.75698	0.0225825	0.585971
ETV6	PTPN11	3	98	56	2797	0.45376	1.52897	0.0130853	0.73736
ETV6	RAD21	1	100	37	2815	1	0.760811	-0.00495446	1
ETV6	RUNX1	25	76	304	2549	7.28225e-05	2.75818	0.0814285	0.000823211
ETV6	SETBP1	11	60	57	1375	0.000211954	4.42251	0.117514	0.00220432
ETV6	SF3B1	9	92	562	2291	0.00470011	0.398789	-0.0496431	0.0333281
ETV6	SMC3	3	88	31	2243	0.140347	2.46664	0.0312422	0.371088
ETV6	SRSF2	21	80	327	2526	0.00718076	2.02775	0.0525942	0.0441023
ETV6	STAG2	9	92	186	2667	0.309177	1.4027	0.0175016	0.595246
ETV6	SUZ12	1	21	15	545	0.464625	1.73016	0.0217748	0.748776
ETV6	TET2	9	92	603	2250	0.00168444	0.365023	-0.0548129	0.0136861
ETV6	TP53	7	94	253	2600	0.594817	0.765285	-0.0124249	0.893945
ETV6	U2AF1	40	61	252	2601	5.00804e-16	6.76815	0.187353	2.79019e-14
ETV6	U2AF2	3	93	26	2718	0.0725476	3.37221	0.0391428	0.244966
ETV6	WT1	3	98	48	2805	0.252446	1.7889	0.0179668	0.539474
ETV6	ZRSR2	1	100	137	2716	0.0888961	0.198248	-0.0328241	0.284176
EZH2	FLT3	4	153	97	2793	0.817896	0.752779	-0.00998555	1
EZH2	GATA2	11	146	58	2832	0.00064884	3.67879	0.0742906	0.00575108
EZH2	IDH1	6	151	79	2811	0.448275	1.41387	0.014607	0.730206
EZH2	IDH2	3	154	114	2776	0.282689	0.474368	-0.0233982	0.574097
EZH2	JAK2	3	145	79	2699	0.797515	0.706853	-0.0108446	1
EZH2	KDM6A	5	142	42	2727	0.0851883	2.28622	0.0327429	0.277605
EZH2	KIT	6	151	27	2863	0.00590949	4.21339	0.0616704	0.0389182
EZH2	KRAS	6	151	67	2823	0.273203	1.67421	0.0217329	0.559312
EZH2	NF1	9	145	92	2706	0.105375	1.82564	0.0312681	0.311247
EZH2	NPM1	0	157	78	2812	0.0327308	0.11374	-0.0377784	0.143943
EZH2	NRAS	20	137	145	2745	0.00034911	2.76365	0.0754248	0.00324173
EZH2	PHF6	8	149	84	2806	0.142772	1.79354	0.0282791	0.376224
EZH2	PRPF8	11	103	51	2121	0.000172201	4.44146	0.0978374	0.00183996
EZH2	PTPN11	4	153	60	2830	0.570117	1.23312	0.00727107	0.865158
EZH2	RAD21	4	153	36	2853	0.148236	2.0719	0.0252812	0.384232
EZH2	RUNX1	62	95	296	2594	2.69803e-20	5.71935	0.200799	1.91315e-18
EZH2	SETBP1	7	70	66	1453	0.0825858	2.20152	0.0486783	0.272953
EZH2	SF3B1	22	135	559	2331	0.116922	0.679547	-0.0299935	0.325398
EZH2	SMC3	5	119	31	2303	0.0323299	3.12144	0.0492652	0.1435
EZH2	SRSF2	4	153	363	2527	2.31917e-05	0.181998	-0.0680069	0.00031736
EZH2	STAG2	26	131	182	2708	1.29963e-05	2.95311	0.0899613	0.000191267
EZH2	SUZ12	0	24	16	542	1	0.670996	-0.0348691	1
EZH2	TET2	64	93	567	2323	3.73264e-09	2.81944	0.115357	1.03981e-07
EZH2	TP53	8	149	266	2624	0.085417	0.529646	-0.03175	0.277605
EZH2	U2AF1	13	144	294	2596	0.498584	0.797147	-0.0139011	0.785647
EZH2	U2AF2	1	145	28	2666	1	0.65665	-0.00778499	1
EZH2	WT1	2	155	51	2839	1	0.71828	-0.00829961	1
EZH2	ZRSR2	20	137	125	2765	3.48865e-05	3.2292	0.087367	0.000461212
FLT3	GATA2	6	95	63	2883	0.0253415	2.89023	0.0457524	0.118362
FLT3	IDH1	6	95	79	2867	0.0606962	2.29207	0.035429	0.214439
FLT3	IDH2	4	97	113	2833	0.794678	1.03385	0.00116164	1
FLT3	JAK2	1	82	81	2762	0.729544	0.415839	-0.0165399	0.97717
FLT3	KDM6A	3	72	44	2797	0.118703	2.64867	0.0308134	0.327168
FLT3	KIT	1	100	32	2914	1	0.910625	-0.0016625	1
FLT3	KRAS	6	95	67	2879	0.0323796	2.7139	0.0429216	0.1435
FLT3	NF1	7	86	94	2765	0.038019	2.39424	0.0407338	0.161668
FLT3	NPM1	11	90	67	2879	3.75461e-05	5.25191	0.0976723	0.000488099
FLT3	NRAS	19	82	146	2800	1.05999e-06	4.4437	0.109604	2.01656e-05
FLT3	PHF6	5	96	87	2859	0.230615	1.71157	0.0208957	0.511022
FLT3	PRPF8	2	61	60	2163	0.688092	1.18197	0.0047926	0.953306
FLT3	PTPN11	5	96	59	2887	0.0590655	2.54855	0.0368006	0.212023
FLT3	RAD21	1	100	39	2906	1	0.745128	-0.00525604	1
FLT3	RUNX1	30	71	328	2618	6.18154e-07	3.37255	0.103237	1.2941e-05
FLT3	SETBP1	0	79	73	1444	0.0471199	0.123604	-0.0499611	0.186566
FLT3	SF3B1	16	85	565	2381	0.442286	0.793254	-0.015207	0.726052
FLT3	SMC3	2	87	34	2335	0.377093	1.57877	0.0126266	0.682292
FLT3	SRSF2	11	90	356	2590	0.876298	0.889201	-0.00656222	1
FLT3	STAG2	4	97	204	2742	0.316526	0.554275	-0.0210415	0.604386
FLT3	SUZ12	0	11	16	555	1	1.46377	-0.0233362	1
FLT3	TET2	14	87	617	2329	0.103426	0.607426	-0.0312886	0.311247
FLT3	TP53	9	92	265	2681	1	0.989705	-0.000527894	1
FLT3	U2AF1	12	89	295	2651	0.502211	1.21165	0.0111076	0.789767
FLT3	U2AF2	2	72	27	2739	0.173675	2.8179	0.0273587	0.432799
FLT3	WT1	14	87	39	2907	6.44137e-10	11.9947	0.171683	2.28376e-08
FLT3	ZRSR2	2	99	143	2803	0.236368	0.395988	-0.0241661	0.517886
GATA2	IDH1	1	68	84	2894	1	0.506653	-0.0123895	1
GATA2	IDH2	1	68	116	2862	0.520707	0.36283	-0.0189369	0.807459
GATA2	JAK2	3	64	79	2780	0.434911	1.64953	0.0155377	0.7219
GATA2	KDM6A	0	65	47	2804	0.625697	0.450703	-0.019326	0.913939
GATA2	KIT	1	68	32	2946	0.5323	1.35386	0.00538611	0.822166
GATA2	KRAS	3	66	70	2908	0.228188	1.88831	0.0194307	0.509752
GATA2	NF1	4	62	97	2789	0.285667	1.855	0.021956	0.577255
GATA2	NPM1	4	65	74	2904	0.0985652	2.41497	0.0311999	0.306298
GATA2	NRAS	10	59	155	2823	0.00348576	3.08693	0.0610543	0.0258942
GATA2	PHF6	3	66	89	2889	0.464037	1.47549	0.0118171	0.748776
GATA2	PRPF8	1	55	61	2169	1	0.646498	-0.00903806	1
GATA2	PTPN11	4	65	60	2918	0.055366	2.99282	0.03924	0.204427
GATA2	RAD21	1	67	39	2939	0.59707	1.12476	0.00208918	0.895258
GATA2	RUNX1	14	55	344	2634	0.0355419	1.94905	0.0403725	0.153164
GATA2	SETBP1	4	51	69	1472	0.313958	1.6732	0.0244046	0.601689
GATA2	SF3B1	12	57	569	2409	0.876753	0.891314	-0.00649662	1
GATA2	SMC3	1	60	35	2362	0.597986	1.12476	0.00232041	0.895258
GATA2	SRSF2	8	61	359	2619	1	0.956756	-0.00210651	1
GATA2	STAG2	7	62	201	2777	0.232631	1.55986	0.0200294	0.514029
GATA2	SUZ12	0	8	16	558	1	1.99109	-0.0198491	1
GATA2	TET2	6	63	625	2353	0.0101874	0.358552	-0.0451265	0.0584278
GATA2	TP53	5	64	269	2709	0.830696	0.786768	-0.00929068	1
GATA2	U2AF1	6	63	301	2677	0.841041	0.847018	-0.00697777	1
GATA2	U2AF2	1	64	28	2747	0.490751	1.53292	0.00787564	0.776441
GATA2	WT1	9	60	44	2934	1.84701e-06	10.0023	0.131615	3.35039e-05
GATA2	ZRSR2	2	67	143	2835	0.771628	0.591796	-0.0133005	1
IDH1	IDH2	1	84	116	2846	0.259481	0.292077	-0.0234798	0.543268
IDH1	JAK2	4	71	78	2773	0.156955	2.00289	0.0248717	0.404044
IDH1	KDM6A	2	72	45	2797	0.336123	1.72654	0.0139786	0.630231
IDH1	KIT	3	82	30	2932	0.0626849	3.57561	0.0400391	0.219257
IDH1	KRAS	1	84	72	2890	0.722366	0.477844	-0.0135076	0.97482
IDH1	NF1	4	79	97	2772	0.530436	1.44695	0.0130797	0.820914
IDH1	NPM1	7	78	71	2891	0.00545022	3.65421	0.0608742	0.0369667
IDH1	NRAS	9	76	156	2806	0.0465021	2.13006	0.0387212	0.185059
IDH1	PHF6	12	73	80	2882	5.98588e-06	5.92192	0.109868	9.33798e-05
IDH1	PRPF8	2	56	60	2168	0.670048	1.29048	0.00731164	0.941689
IDH1	PTPN11	3	82	61	2901	0.424328	1.7399	0.0168811	0.711776
IDH1	RAD21	5	80	35	2926	0.0045864	5.225	0.0680036	0.0328201
IDH1	RUNX1	17	68	341	2621	0.0247274	1.92155	0.0434056	0.116893
IDH1	SETBP1	0	47	73	1476	0.271447	0.211457	-0.038136	0.55718
IDH1	SF3B1	9	76	572	2390	0.0488317	0.494801	-0.0365667	0.191623
IDH1	SMC3	4	66	32	2356	0.0178712	4.46212	0.0605664	0.091474
IDH1	SRSF2	26	59	341	2621	3.13671e-06	3.38715	0.0965124	5.20561e-05
IDH1	STAG2	8	77	200	2762	0.37738	1.43481	0.017366	0.682292
IDH1	SUZ12	2	22	14	544	0.137545	3.53247	0.0708278	0.364914
IDH1	TET2	15	70	616	2346	0.586994	0.816095	-0.0127999	0.884941
IDH1	TP53	1	84	273	2689	0.00591209	0.11726	-0.0462831	0.0389182
IDH1	U2AF1	7	78	300	2662	0.714938	0.796325	-0.0103564	0.97482
IDH1	U2AF2	0	72	29	2739	1	0.640444	-0.0163814	1
IDH1	WT1	2	83	51	2911	0.658912	1.37538	0.00794983	0.932562
IDH1	ZRSR2	3	82	142	2820	0.797115	0.726554	-0.00978224	1
IDH2	JAK2	4	102	78	2742	0.539689	1.37858	0.0114079	0.830291
IDH2	KDM6A	2	98	45	2771	0.675242	1.25669	0.00580919	0.942199
IDH2	KIT	1	116	32	2898	1	0.780711	-0.00440828	1
IDH2	KRAS	3	114	70	2860	0.758211	1.07519	0.00219934	0.998995
IDH2	NF1	7	101	94	2750	0.0957821	2.0276	0.0328047	0.300209
IDH2	NPM1	7	110	71	2859	0.0285053	2.56248	0.0433099	0.130024
IDH2	NRAS	11	106	154	2776	0.0598281	1.87062	0.0351997	0.213086
IDH2	PHF6	5	112	87	2843	0.400945	1.45885	0.0146455	0.691896
IDH2	PRPF8	1	69	61	2155	1	0.511998	-0.0140444	1
IDH2	PTPN11	1	116	63	2867	0.516664	0.39231	-0.0173595	0.802785
IDH2	RAD21	3	114	37	2892	0.197127	2.0569	0.0219615	0.471652
IDH2	RUNX1	25	92	333	2597	0.00292193	2.11924	0.0596886	0.0219145
IDH2	SETBP1	0	60	73	1463	0.109509	0.164558	-0.0432705	0.314098
IDH2	SF3B1	7	110	574	2356	6.04951e-05	0.261197	-0.0665613	0.000709105
IDH2	SMC3	2	87	34	2335	0.377093	1.57877	0.0126266	0.682292
IDH2	SRSF2	54	63	313	2617	5.39183e-21	7.16659	0.209413	5.25703e-19
IDH2	STAG2	29	88	179	2751	2.90294e-10	5.06469	0.142306	1.07823e-08
IDH2	SUZ12	1	22	15	544	0.479922	1.64848	0.0198324	0.769555
IDH2	TET2	8	109	623	2307	3.83646e-05	0.271783	-0.0684046	0.000490564
IDH2	TP53	5	112	269	2661	0.0700449	0.441616	-0.032963	0.238581
IDH2	U2AF1	10	107	297	2633	0.7533	0.828535	-0.0101472	0.994203
IDH2	U2AF2	0	98	29	2713	0.623726	0.466919	-0.0192021	0.913939
IDH2	WT1	1	116	52	2878	0.721793	0.477122	-0.0135229	0.97482
IDH2	ZRSR2	0	117	145	2785	0.00615757	0.0814652	-0.0446678	0.0393681
JAK2	KDM6A	4	77	43	2764	0.041106	3.33917	0.0444501	0.169644
JAK2	KIT	3	79	26	2818	0.0459162	4.11587	0.045723	0.183914
JAK2	KRAS	1	81	65	2779	1	0.527825	-0.0118488	1
JAK2	NF1	7	74	88	2690	0.0167369	2.89158	0.0506758	0.088808
JAK2	NPM1	3	79	70	2774	0.458217	1.50488	0.0126687	0.741512
JAK2	NRAS	2	80	140	2704	0.434991	0.482857	-0.0190756	0.7219
JAK2	PHF6	5	77	80	2764	0.087785	2.24351	0.0322784	0.282076
JAK2	PRPF8	2	52	60	2172	0.656769	1.39231	0.00949455	0.932562
JAK2	PTPN11	2	80	57	2787	0.680903	1.22237	0.00510536	0.94671
JAK2	RAD21	0	82	37	2806	0.625041	0.453576	-0.019223	0.913939
JAK2	RUNX1	12	70	315	2529	0.288554	1.37633	0.0186391	0.581582
JAK2	SETBP1	1	33	67	1374	1	0.621438	-0.0122251	1
JAK2	SF3B1	19	63	550	2294	0.395776	1.25789	0.0159785	0.691896
JAK2	SMC3	2	54	32	2276	0.191706	2.63426	0.0279084	0.464381
JAK2	SRSF2	7	75	339	2505	0.485961	0.689676	-0.0172925	0.773571
JAK2	STAG2	6	76	188	2656	0.820145	1.11534	0.00468753	1
JAK2	SUZ12	3	17	13	549	0.0146265	7.45249	0.141341	0.0797808
JAK2	TET2	24	58	582	2262	0.0708481	1.60825	0.0358574	0.240268
JAK2	TP53	3	79	252	2592	0.112374	0.390597	-0.0304406	0.317578
JAK2	U2AF1	4	78	284	2560	0.18407	0.462261	-0.0282995	0.452768
JAK2	U2AF2	0	77	29	2734	1	0.598032	-0.016956	1
JAK2	WT1	1	81	49	2795	1	0.704208	-0.00641087	1
JAK2	ZRSR2	3	79	134	2710	1	0.767995	-0.00822758	1
KDM6A	KIT	1	46	29	2840	0.387336	2.12894	0.013938	0.69177
KDM6A	KRAS	1	46	59	2810	1	1.03537	0.000631542	1
KDM6A	NF1	9	38	86	2726	1.61879e-05	7.50734	0.114156	0.000229573
KDM6A	NPM1	3	44	68	2801	0.104961	2.80849	0.0327863	0.311247
KDM6A	NRAS	2	45	132	2737	1	0.921549	-0.00207846	1
KDM6A	PHF6	0	47	84	2785	0.645237	0.346995	-0.0220433	0.924543
KDM6A	PRPF8	4	29	58	2195	0.0111374	5.21998	0.0701028	0.0629503
KDM6A	PTPN11	1	46	58	2811	0.620329	1.0536	0.000948507	0.913939
KDM6A	RAD21	0	47	38	2830	1	0.773889	-0.0147123	1
KDM6A	RUNX1	6	41	309	2560	0.634188	1.21241	0.00809607	0.91535
KDM6A	SETBP1	1	23	65	1376	1	0.920401	-0.00210586	1
KDM6A	SF3B1	14	33	548	2321	0.0902897	1.79684	0.0341176	0.287453
KDM6A	SMC3	1	32	32	2262	0.377885	2.20898	0.0163536	0.682292
KDM6A	SRSF2	2	45	328	2541	0.161933	0.344309	-0.0285299	0.408854
KDM6A	STAG2	5	42	185	2684	0.229388	1.72716	0.0213794	0.509752
KDM6A	SUZ12	4	7	12	559	0.000112866	26.619	0.285338	0.00125765
KDM6A	TET2	8	39	592	2277	0.715692	0.788981	-0.0112551	0.97482
KDM6A	TP53	6	41	251	2618	0.300498	1.52638	0.0178451	0.585971
KDM6A	U2AF1	5	42	283	2586	0.804793	1.08783	0.00326796	1
KDM6A	U2AF2	0	45	29	2766	1	1.03055	-0.012888	1
KDM6A	WT1	1	46	49	2820	0.559315	1.25111	0.00407173	0.853749
KDM6A	ZRSR2	4	43	133	2736	0.279308	1.91362	0.0230604	0.570314
KIT	KRAS	1	32	72	2942	0.552699	1.27691	0.0043417	0.848632
KIT	NF1	2	30	99	2821	0.299782	1.89966	0.0162896	0.585971
KIT	NPM1	0	33	78	2936	1	0.558323	-0.0169601	1
KIT	NRAS	3	30	162	2852	0.421491	1.76049	0.0169947	0.710072
KIT	PHF6	2	31	90	2924	0.262791	2.09606	0.0185967	0.545152
KIT	PRPF8	0	15	62	2209	1	1.14039	-0.0135696	1
KIT	PTPN11	0	33	64	2950	1	0.682749	-0.0153267	1
KIT	RAD21	1	32	39	2974	0.355028	2.38301	0.0157856	0.656214
KIT	RUNX1	8	25	350	2664	0.0489222	2.43566	0.0405969	0.191623
KIT	SETBP1	0	13	73	1510	1	0.761149	-0.01984	1
KIT	SF3B1	6	27	575	2439	1	0.942609	-0.00236029	1
KIT	SMC3	0	19	36	2403	1	1.68844	-0.0107606	1
KIT	SRSF2	7	26	360	2654	0.107426	1.98483	0.0294719	0.313351
KIT	STAG2	3	30	205	2809	0.489728	1.37024	0.0093955	0.776399
KIT	SUZ12	0	3	16	563	1	4.87879	-0.0121024	1
KIT	TET2	16	17	615	2399	0.000318787	3.67135	0.0717239	0.0030698
KIT	TP53	2	31	272	2742	0.763834	0.65038	-0.0107238	1
KIT	U2AF1	3	30	304	2710	1	0.891447	-0.00342265	1
KIT	U2AF2	0	28	29	2783	1	1.65537	-0.0101354	1
KIT	WT1	1	32	52	2962	0.441303	1.78005	0.0103319	0.726052
KIT	ZRSR2	5	28	140	2874	0.0183954	3.66582	0.0510805	0.0925704
KRAS	NF1	2	65	99	2786	1	0.86589	-0.00365798	1
KRAS	NPM1	5	68	73	2901	0.0374502	2.92204	0.042551	0.160501
KRAS	NRAS	17	56	148	2826	1.63788e-07	5.79657	0.123726	3.87136e-06
KRAS	PHF6	1	72	91	2883	0.725357	0.440018	-0.0151023	0.976742
KRAS	PRPF8	2	53	60	2171	0.659967	1.36541	0.0089333	0.932562
KRAS	PTPN11	5	68	59	2915	0.0174896	3.63285	0.0518846	0.0906009
KRAS	RAD21	1	72	39	2934	0.62343	1.04487	0.000779987	0.913939
KRAS	RUNX1	20	53	338	2636	0.000270443	2.94295	0.0761352	0.00263682
KRAS	SETBP1	1	45	72	1478	0.720187	0.456173	-0.0197902	0.97482
KRAS	SF3B1	5	68	576	2398	0.00593752	0.306117	-0.0487305	0.0389182
KRAS	SMC3	4	65	32	2357	0.0170258	4.53269	0.0612912	0.0894647
KRAS	SRSF2	14	59	353	2621	0.0674462	1.76185	0.034337	0.232779
KRAS	STAG2	6	67	202	2772	0.634877	1.2289	0.00865237	0.91535
KRAS	SUZ12	0	7	16	559	1	2.26061	-0.018551	1
KRAS	TET2	21	52	610	2364	0.106143	1.56507	0.0311559	0.311247
KRAS	TP53	6	67	268	2706	1	0.90421	-0.00423493	1
KRAS	U2AF1	14	59	293	2681	0.0160833	2.17123	0.0473788	0.0859243
KRAS	U2AF2	2	56	27	2755	0.117227	3.64418	0.0348595	0.325398
KRAS	WT1	3	70	50	2924	0.132441	2.50629	0.028404	0.356221
KRAS	ZRSR2	8	65	137	2837	0.0211313	2.54868	0.045628	0.104319
NF1	NPM1	3	98	73	2778	0.744141	1.16494	0.0047035	0.985451
NF1	NRAS	9	92	144	2707	0.103761	1.83899	0.0316521	0.311247
NF1	PHF6	5	96	82	2769	0.221343	1.75877	0.0222952	0.504818
NF1	PRPF8	4	69	58	2155	0.133661	2.15392	0.0309413	0.357041
NF1	PTPN11	9	92	55	2796	0.000258464	4.97312	0.0871434	0.00255192
NF1	RAD21	3	98	36	2814	0.147103	2.39286	0.0271784	0.384232
NF1	RUNX1	17	84	324	2527	0.110668	1.57845	0.0310919	0.315039
NF1	SETBP1	6	45	65	1385	0.0300896	2.84103	0.0621469	0.135664
NF1	SF3B1	20	81	547	2304	0.897686	1.04002	0.00284128	1
NF1	SMC3	4	75	31	2280	0.0265967	3.92258	0.0553919	0.123485
NF1	SRSF2	15	86	326	2525	0.269918	1.35094	0.0194317	0.555505
NF1	STAG2	11	90	188	2663	0.102878	1.73126	0.031152	0.311247
NF1	SUZ12	2	17	14	520	0.100767	4.36975	0.0858974	0.308229
NF1	TET2	23	78	587	2264	0.616787	1.13729	0.00980069	0.913939
NF1	TP53	10	91	249	2602	0.718955	1.14833	0.00749965	0.97482
NF1	U2AF1	5	96	294	2557	0.0918024	0.452983	-0.032304	0.291081
NF1	U2AF2	1	91	28	2691	0.62089	1.05612	0.00100661	0.913939
NF1	WT1	2	99	49	2802	0.693254	1.15523	0.00364818	0.958755
NF1	ZRSR2	6	95	135	2716	0.481112	1.27064	0.0102744	0.769555
NPM1	NRAS	12	66	153	2816	0.00080997	3.34641	0.0713998	0.00709519
NPM1	PHF6	5	73	87	2882	0.0846226	2.26893	0.0321186	0.277605
NPM1	PRPF8	3	59	59	2165	0.235442	1.86584	0.0218583	0.51731
NPM1	PTPN11	6	72	58	2911	0.00533555	4.18247	0.0632057	0.03681
NPM1	RAD21	1	77	39	2929	1	0.975358	-0.000443535	1
NPM1	RUNX1	4	74	354	2615	0.0734104	0.399298	-0.0333277	0.246811
NPM1	SETBP1	0	61	73	1462	0.11047	0.161772	-0.0436438	0.315039
NPM1	SF3B1	5	73	576	2393	0.00202439	0.284556	-0.0522257	0.0161125
NPM1	SMC3	3	67	33	2355	0.0809274	3.19539	0.0402064	0.269758
NPM1	SRSF2	7	71	360	2609	0.483235	0.714515	-0.0152894	0.770804
NPM1	STAG2	3	75	205	2764	0.36838	0.539317	-0.0191536	0.674498
NPM1	SUZ12	2	29	14	537	0.207424	2.64532	0.0537096	0.485486
NPM1	TET2	11	67	620	2349	0.158638	0.622027	-0.0264248	0.407033
NPM1	TP53	2	76	272	2697	0.0431647	0.260933	-0.036422	0.176275
NPM1	U2AF1	2	76	305	2664	0.0208041	0.229853	-0.0404473	0.103358
NPM1	U2AF2	0	70	29	2741	1	0.659094	-0.0161465	1
NPM1	WT1	8	70	45	2924	4.48502e-05	7.42603	0.105594	0.000564245
NPM1	ZRSR2	0	78	145	2824	0.05142	0.123646	-0.0362308	0.195647
NRAS	PHF6	11	154	81	2801	0.0153521	2.47002	0.0509996	0.0831572
NRAS	PRPF8	3	112	59	2112	1	0.958838	-0.00146598	1
NRAS	PTPN11	12	153	52	2830	0.00011908	4.26848	0.0863047	0.0013082
NRAS	RAD21	2	163	38	2843	1	0.917985	-0.00212484	1
NRAS	RUNX1	57	108	301	2581	1.61938e-15	4.52556	0.169392	7.89447e-14
NRAS	SETBP1	6	108	67	1415	0.642701	1.1733	0.00914976	0.923229
NRAS	SF3B1	6	159	575	2307	2.72025e-09	0.151403	-0.0939925	8.16075e-08
NRAS	SMC3	6	140	30	2282	0.0175394	3.26	0.0553285	0.0906009
NRAS	SRSF2	29	136	338	2544	0.0354272	1.60494	0.0406612	0.153164
NRAS	STAG2	28	137	180	2702	3.54673e-06	3.06796	0.0962349	5.76344e-05
NRAS	SUZ12	0	24	16	542	1	0.670996	-0.0348691	1
NRAS	TET2	41	124	590	2292	0.198501	1.28447	0.0244434	0.473487
NRAS	TP53	10	155	264	2618	0.207809	0.639785	-0.0245221	0.485486
NRAS	U2AF1	32	133	275	2607	0.000253886	2.2809	0.0740742	0.00253886
NRAS	U2AF2	5	127	24	2684	0.00969927	4.40289	0.0607606	0.0573139
NRAS	WT1	8	157	45	2837	0.00683999	3.21246	0.0569028	0.0426815
NRAS	ZRSR2	10	155	135	2747	0.448421	1.31278	0.0146315	0.730206
PHF6	PRPF8	2	65	60	2159	0.703248	1.10718	0.00291942	0.967432
PHF6	PTPN11	4	88	60	2895	0.125965	2.19318	0.0276536	0.342344
PHF6	RAD21	3	89	37	2917	0.118405	2.65746	0.0301933	0.327168
PHF6	RUNX1	32	60	326	2629	3.48006e-09	4.30102	0.126214	1.00535e-07
PHF6	SETBP1	5	49	68	1474	0.0965625	2.21188	0.0419678	0.301275
PHF6	SF3B1	10	82	571	2384	0.042861	0.509162	-0.036824	0.175956
PHF6	SMC3	2	74	34	2348	0.306613	1.86645	0.0173516	0.591975
PHF6	SRSF2	5	87	362	2593	0.0498222	0.411666	-0.0358326	0.191623
PHF6	STAG2	5	87	203	2752	0.832602	0.779118	-0.00973619	1
PHF6	SUZ12	1	17	15	549	0.39912	2.15294	0.0306622	0.691896
PHF6	TET2	23	69	608	2347	0.297301	1.28673	0.018685	0.585594
PHF6	TP53	3	89	271	2684	0.0610599	0.333845	-0.0353518	0.214535
PHF6	U2AF1	30	62	277	2678	1.49775e-09	4.678	0.132089	4.86769e-08
PHF6	U2AF2	1	78	28	2733	0.560554	1.25137	0.00411715	0.853969
PHF6	WT1	3	89	50	2905	0.214092	1.95843	0.0205344	0.492601
PHF6	ZRSR2	7	85	138	2817	0.20594	1.68107	0.0236204	0.485296
PRPF8	PTPN11	2	60	51	2173	0.653664	1.42026	0.0100669	0.930398
PRPF8	RAD21	2	60	28	2195	0.194772	2.6131	0.0280653	0.468897
PRPF8	RUNX1	9	53	252	1972	0.417701	1.32884	0.0162692	0.705209
PRPF8	SETBP1	4	47	61	1285	0.293887	1.79281	0.0294838	0.584774
PRPF8	SF3B1	6	56	386	1838	0.125788	0.510178	-0.0330916	0.342344
PRPF8	SMC3	1	61	31	2193	0.587692	1.1597	0.00302825	0.884941
PRPF8	SRSF2	3	59	237	1987	0.203565	0.426303	-0.0308291	0.483923
PRPF8	STAG2	6	56	147	2077	0.303252	1.51385	0.0199405	0.589867
PRPF8	SUZ12	2	19	14	517	0.120025	3.88722	0.0785348	0.329646
PRPF8	TET2	7	55	439	1785	0.105589	0.517498	-0.0346327	0.311247
PRPF8	TP53	5	57	206	2018	1	0.859308	-0.00672352	1
PRPF8	U2AF1	6	56	236	1988	1	0.902542	-0.00493179	1
PRPF8	U2AF2	1	57	24	2167	0.481465	1.58406	0.00950548	0.769555
PRPF8	WT1	1	61	40	2184	1	0.895082	-0.00227236	1
PRPF8	ZRSR2	1	61	107	2117	0.36475	0.324345	-0.0244869	0.672024
PTPN11	RAD21	2	62	38	2944	0.204737	2.49915	0.0233159	0.483923
PTPN11	RUNX1	16	48	342	2641	0.00254562	2.57407	0.0602752	0.0194665
PTPN11	SETBP1	5	43	68	1480	0.0644852	2.53078	0.0492462	0.223584
PTPN11	SF3B1	7	57	574	2409	0.107664	0.515404	-0.0303155	0.313351
PTPN11	SMC3	2	57	34	2365	0.213349	2.44066	0.0251325	0.492601
PTPN11	SRSF2	11	53	356	2627	0.240079	1.53153	0.0231441	0.523077
PTPN11	STAG2	9	55	199	2784	0.038137	2.28926	0.0420268	0.161668
PTPN11	SUZ12	0	19	16	547	1	0.850816	-0.0308869	1
PTPN11	TET2	16	48	615	2368	0.434709	1.28347	0.0155111	0.7219
PTPN11	TP53	7	57	267	2716	0.510531	1.24923	0.00995901	0.799627
PTPN11	U2AF1	5	59	302	2681	0.67711	0.752329	-0.0110122	0.943118
PTPN11	U2AF2	2	55	27	2756	0.113883	3.71178	0.0354126	0.320683
PTPN11	WT1	2	62	51	2932	0.306532	1.85452	0.015524	0.591975
PTPN11	ZRSR2	3	61	142	2841	1	0.983953	-0.000490417	1
RAD21	RUNX1	9	31	349	2657	0.044993	2.21028	0.0384939	0.182784
RAD21	SETBP1	0	20	73	1502	1	0.49859	-0.0246791	1
RAD21	SF3B1	5	35	576	2430	0.416103	0.602679	-0.0193024	0.704941
RAD21	SMC3	1	32	35	2389	0.387568	2.13304	0.0151981	0.69177
RAD21	SRSF2	9	31	358	2648	0.0498655	2.14741	0.0370357	0.191623
RAD21	STAG2	4	36	204	2802	0.348054	1.52614	0.0145036	0.647928
RAD21	SUZ12	2	12	14	553	0.053375	6.58333	0.110729	0.19825
RAD21	TET2	10	30	621	2385	0.554652	1.28019	0.0121947	0.848816
RAD21	TP53	0	40	273	2733	0.0456818	0.123389	-0.0361944	0.183914
RAD21	U2AF1	3	37	304	2702	0.792787	0.720661	-0.00988135	1
RAD21	U2AF2	0	36	29	2774	1	1.28837	-0.0115129	1
RAD21	WT1	3	37	50	2956	0.0312455	4.79351	0.0508157	0.140066
RAD21	ZRSR2	5	35	140	2866	0.0391817	2.92449	0.0419304	0.163432
RUNX1	SETBP1	15	203	58	1320	0.0824434	1.68167	0.0439172	0.272953
RUNX1	SF3B1	43	315	538	2151	0.00018733	0.545778	-0.065545	0.00197456
RUNX1	SMC3	6	301	30	2121	0.443078	1.4093	0.015403	0.726052
RUNX1	SRSF2	110	248	257	2432	1.54072e-24	4.19731	0.209427	2.78698e-22
RUNX1	STAG2	77	281	131	2558	3.70949e-23	5.35074	0.212417	4.82233e-21
RUNX1	SUZ12	2	52	14	514	0.652913	1.41209	0.0186698	0.930398
RUNX1	TET2	95	263	536	2153	0.00537992	1.45093	0.0524725	0.03681
RUNX1	TP53	14	344	260	2429	0.000160971	0.38021	-0.064817	0.00174385
RUNX1	U2AF1	47	311	260	2429	0.0491425	1.41186	0.0370085	0.191623
RUNX1	U2AF2	8	301	21	2510	0.00991437	3.17671	0.0544919	0.0581444
RUNX1	WT1	12	346	41	2648	0.0275644	2.23995	0.0450054	0.12722
RUNX1	ZRSR2	21	337	124	2565	0.290539	1.28901	0.0189753	0.584031
SETBP1	SF3B1	4	69	134	1389	0.399485	0.600909	-0.0246716	0.691896
SETBP1	SMC3	1	72	20	1476	1	1.025	0.000604199	1
SETBP1	SRSF2	15	58	121	1402	0.000818676	2.99658	0.0943068	0.00709519
SETBP1	STAG2	5	68	106	1417	1	0.982936	-0.000908592	1
SETBP1	SUZ12	1	17	15	549	0.39912	2.15294	0.0306622	0.691896
SETBP1	TET2	9	64	182	1341	0.854466	1.03614	0.00243734	1
SETBP1	TP53	2	71	181	1342	0.0130586	0.208855	-0.0599632	0.0722389
SETBP1	U2AF1	18	55	177	1346	0.00267696	2.48875	0.0831592	0.0202721
SETBP1	U2AF2	4	60	14	1311	0.00770796	6.24286	0.0962708	0.0469704
SETBP1	WT1	1	72	40	1483	1	0.514931	-0.0165931	1
SETBP1	ZRSR2	6	67	43	1480	0.0217722	3.08226	0.0653468	0.10614
SF3B1	SMC3	5	411	31	2011	0.822995	0.789185	-0.00986945	1
SF3B1	SRSF2	13	568	354	2112	2.01193e-20	0.136548	-0.146253	1.56931e-18
SF3B1	STAG2	18	563	190	2276	2.30047e-05	0.382986	-0.071756	0.00031736
SF3B1	SUZ12	0	68	16	498	0.238154	0.220526	-0.061154	0.520336
SF3B1	TET2	165	416	466	2000	8.90826e-07	1.70229	0.0921193	1.74455e-05
SF3B1	TP53	14	567	260	2206	4.91353e-12	0.209497	-0.111693	2.1292e-10
SF3B1	U2AF1	6	575	301	2165	7.25903e-22	0.0750542	-0.145822	8.08863e-20
SF3B1	U2AF2	2	549	27	2262	0.0997579	0.305201	-0.0321194	0.308061
SF3B1	WT1	6	575	47	2419	0.162041	0.537058	-0.0262388	0.408854
SF3B1	ZRSR2	20	561	125	2341	0.104508	0.667665	-0.0300145	0.311247
SMC3	SRSF2	6	30	277	2145	0.29591	1.54874	0.0196836	0.585174
SMC3	STAG2	3	33	172	2250	0.739512	1.18922	0.00575432	0.980985
SMC3	SUZ12	1	8	15	558	0.223263	4.65	0.0640925	0.507712
SMC3	TET2	14	22	468	1954	0.0091435	2.65695	0.0592003	0.0544422
SMC3	TP53	1	35	234	2188	0.250006	0.267155	-0.0281225	0.537202
SMC3	U2AF1	5	31	256	2166	0.580849	1.36467	0.0129427	0.878028
SMC3	U2AF2	1	29	24	2224	0.283369	3.1954	0.0247921	0.574097
SMC3	WT1	0	36	44	2378	1	0.732184	-0.0164597	1
SMC3	ZRSR2	3	33	116	2306	0.251738	1.80721	0.019835	0.539439
SRSF2	STAG2	86	281	122	2558	2.77459e-29	6.41701	0.243675	1.0381e-26
SRSF2	SUZ12	1	47	15	519	1	0.73617	-0.0122083	1
SRSF2	TET2	135	232	496	2184	2.6319e-14	2.56222	0.146808	1.20758e-12
SRSF2	TP53	11	356	263	2417	2.3243e-06	0.283964	-0.0775514	4.02879e-05
SRSF2	U2AF1	8	359	299	2381	8.54804e-10	0.177453	-0.0970692	2.8989e-08
SRSF2	U2AF2	3	324	26	2487	1	0.885684	-0.00372072	1
SRSF2	WT1	1	366	52	2628	0.0170901	0.138083	-0.0415227	0.0894647
SRSF2	ZRSR2	11	356	134	2546	0.115073	0.587079	-0.0306189	0.322865
STAG2	SUZ12	5	58	11	508	0.0215889	3.98119	0.110532	0.105908
STAG2	TET2	58	150	573	2266	0.0100519	1.52912	0.0479318	0.0583294
STAG2	TP53	2	206	272	2567	8.94641e-07	0.0916262	-0.0759864	1.74455e-05
STAG2	U2AF1	25	183	282	2557	0.339193	1.23871	0.017479	0.63432
STAG2	U2AF2	8	175	21	2636	0.000338737	5.73823	0.0874627	0.00318331
STAG2	WT1	1	207	52	2787	0.26266	0.258919	-0.0260592	0.545152
STAG2	ZRSR2	7	201	138	2701	0.400406	0.681628	-0.0177159	0.691896
SUZ12	TET2	7	9	82	484	0.00551376	4.59079	0.132941	0.0370753
SUZ12	TP53	0	16	49	517	0.384416	0.316804	-0.0509784	0.690886
SUZ12	U2AF1	2	14	50	516	0.645995	1.47429	0.021015	0.924543
SUZ12	U2AF2	0	14	1	529	1	12.1724	-0.00697471	1
SUZ12	WT1	0	16	8	558	1	1.99109	-0.0198491	1
SUZ12	ZRSR2	0	16	23	543	1	0.700838	-0.0341044	1
TET2	TP53	32	599	242	2174	6.09103e-05	0.479918	-0.0700487	0.000709105
TET2	U2AF1	55	576	252	2164	0.234479	0.819968	-0.0230762	0.516649
TET2	U2AF2	6	578	23	2233	1	1.00782	0.000317342	1
TET2	WT1	8	623	45	2371	0.392796	0.676583	-0.0184347	0.691896
TET2	ZRSR2	73	558	72	2344	3.72391e-16	4.25906	0.163479	2.23434e-14
TP53	U2AF1	22	252	285	2488	0.292015	0.762128	-0.0213695	0.584031
TP53	U2AF2	3	246	26	2565	0.737079	1.2031	0.0056643	0.980454
TP53	WT1	1	273	52	2721	0.0850366	0.191674	-0.0330475	0.277605
TP53	ZRSR2	9	265	136	2637	0.296338	0.658518	-0.0217655	0.585174
U2AF1	U2AF2	6	273	23	2538	0.0584043	2.42523	0.0370799	0.210905
U2AF1	WT1	1	306	52	2688	0.038508	0.168929	-0.0361955	0.162358
U2AF1	ZRSR2	11	296	134	2606	0.39517	0.722721	-0.0184857	0.691896
U2AF2	WT1	1	28	48	2763	0.397848	2.0558	0.0134392	0.691896
U2AF2	ZRSR2	0	29	135	2676	0.398598	0.334793	-0.0226909	0.691896
WT1	ZRSR2	1	52	144	2850	0.516206	0.380609	-0.0179487	0.802785

## Sheet: ST4
Supplementary Table S4: The antibodies used in the FACS experiments
Fluorescence	Cell surfacte marker	Clone	Company
FITC	CD34	RAM34	eBioscience
FITC	CD41	MWReg30	BioLegend
FITC	CD45	30-F11	BD Pharmingen
FITC	CD45.2	104	BioLegend
FITC	CD48	HM48-1	BioLegend
FITC	CD127(IL-7Rα)	A7R34	eBioscience
FITC	Ki-67	SolA15	eBioscience
FITC	Annexin V		BioLegend
PE	CD4	RM4-5	BD Biosciences
PE	CD8a	53-6.7	BD Pharmingen
PE	CD71	C2	BD Biosciences
PE	CD127	SB/199	BD Biosciences
PE	CD135 (Flt3)	A2F10	eBioscience
PE	CD150	TC15-12F12.2	BioLegend
PE	Sca-I (Ly-6A/E)	D7	eBioscience
PE-Cy7	CD16/32 (FCγR)	93	eBioscience
PE-Cy7	Sca-I (Ly-6A/E)	D7	eBioscience
PE-Cy7	CD45.1	A20	BioLegend
PE-Cy7	CD150	TC15-12F12.2	BioLegend
PE-Cy7	Gr-1	RB6-8C5	eBioscience
APC	CD11b	M1/70	BioLegend
APC	CD117(c-Kit)	2B8	eBioscience
APC	Ter119	TER-119	eBioscience
APC-Cy7	Streptavidin		eBioscience
Alexa Fluor 700	CD16/32 (FCγR)	93	eBioscience
Brilliant Violet 421	CD45R/B220	RA3-6B2	BioLegend
Brilliant Violet 421	CD105	MJ7/18	BD Biosciences
Brilliant Violet 421	CD135 (Flt3)	A2F10	BioLegend
Brilliant Violet 421	CD45.1	A20	BioLegend
Brilliant Violet 510	CD45.2	104	BioLegend
Biotin	Gr1	RB6-8C5	BioLegend
Biotin	CD11b	M1/70	eBioscience
Biotin	Ter119	TER-119	eBioscience
Biotin	CD45R/B220	RA3-6B2	eBioscience
Biotin	CD3e	145-2C11	eBioscience
Biotin	CD4	GK1.5	BD Pharmingen
Biotin	CD8a	53-6.7	eBioscience
Biotin	CD19	eBio1D3	eBioscience
Biotin	CD127	B12-1	BD Biosciences

## Sheet: ST5
Supplementary Table S5: sgRNA sequences used for gene knockout and PCR primers for confirmation
sgRNAname	sgRNA sequence	PCR primer 1	PCR primer 2
sgSTAG2	5’ AATGGTCATCACCAACAGAA 3’	5’ ACAGCAAGCAAACTAAGGCA 3’	5’ ACATCCTTACCTTCCTCTCCAC 3’
sgRUNX1	5’ CTGATCGTAGGACCACGGTG 3’	5’ AAAGCTGAGACGAGTGCCTC 3’	5’ GGGTCCTAACTCAATCGGCT 3’
non-targeting #1	5’ TGCGAATACGCCCACGCGAT 3’
non-targeting #2	5’ GTACGTCGGTATAACTCCTC 3’

## Sheet: ST6
Supplementary Table S6: Genotypes of CRISPR-KO HL-60 clones
Clone	genotype	sgRNA1	sgRNA2	Indel in STAG2 gene	Indel in RUNX1 gene
WT #1	WT	non-targeting #1	non-targeting #2	NA	NA
WT #2	WT	non-targeting #1	non-targeting #2	NA	NA
WT #3	WT	non-targeting #1	non-targeting #2	NA	NA
WT #4	WT	non-targeting #1	non-targeting #2	NA	NA
WT #5	WT	non-targeting #1	non-targeting #2	NA	NA
SKO #1	SKO	sgSTAG2	non-targeting #2	exon16 (11 del)	NA
SKO #2	SKO	sgSTAG2	non-targeting #2	exon16 (19 del)	NA
SKO #3	SKO	sgSTAG2	non-targeting #2	exon16 (1 ins, 11 del)	NA
SKO #4	SKO	sgSTAG2	non-targeting #2	exon16 (11 del, 1 del)	NA
SKO #5	SKO	sgSTAG2	non-targeting #2	exon16 (11 del, 4 del)	NA
RKO #1	RKO	non-targeting #1	sgRUNX1	NA	exon3 (7 del)
RKO #2	RKO	non-targeting #1	sgRUNX1	NA	exon3 (1 del)
RKO #3	RKO	non-targeting #1	sgRUNX1	NA	exon3 (1 ins, 7 ins, 1 del, 5 de,l 7 del)
RKO #4	RKO	non-targeting #1	sgRUNX1	NA	exon3 (5 del)
RKO #5	RKO	non-targeting #1	sgRUNX1	NA	exon3 (11 del)
DKO #1	DKO	sgSTAG2	sgRUNX1	exon16 (4 del)	exon3 (1 del, 7 del)
DKO #2	DKO	sgSTAG2	sgRUNX1	exon16 (11 del)	exon3 (7 del)
DKO #3	DKO	sgSTAG2	sgRUNX1	exon16 (2 del)	exon3 (1 ins, 1 del, 7 del, 5 del, 13 del, 25 del)
DKO #4	DKO	sgSTAG2	sgRUNX1	exon16 (11 del, 1 ins)	exon3 (1 ins, 5 del, 7 del)
DKO #5	DKO	sgSTAG2	sgRUNX1	exon16 (11 del)	exon3 (4 del, 5 del, 7 del, 11 del)

## Sheet: ST7
Supplementary Table S7: Mutations in human MDS/AML RNA-seq datasets
Cohort			Nature (n = 451)			TCGA (n = 179)			Pavia (n = 100)
			n	%		n	%		n	%
Cohesin/STAG2 mutations
	Cohesin		35	7.8		25	14		5	5
	STAG2		22	4.9		6	3.4		2	2
Mutations in the four genes (STAG2/RUNX1/SRSF2/ASXL1)
	1		73	16.2		18	10.1		30	30
	2		23	5.1		4	2.2		6	6
	3		7	1.6		0	0		4	4
	4		1	0.2		0	0		0	0
STAG2 and other three (RUNX1/SRSF2/ASXL1) mutations
	STAG2 mutation only		11	2.4		5	2.8		0	0
	STAG2 and other three mutations		11	2.4		1	0.6		2	2
black: used
gray: not used

## Sheet: ST8
Supplementary Table S8: Up-regulated genes in RNA-seq of SKO LSK cells (vs WT, edgeR; FDR < 0.05)
Symbol	RefSeqID	logFC	logCPM	LR	PValue	FDR
Gbp4	NM_001256005	3.03094	4.76702	439.201	1.61531e-97	2.01203e-93
Robo3	NM_001164767	3.29263	4.349	407.799	1.10457e-90	6.87923e-87
Pgr	NM_008829	1.85389	6.59178	363.514	4.83624e-81	2.00801e-77
Gbp6	NM_194336	2.24104	5.85551	185.335	3.31598e-42	5.16298e-39
Itgb3	NM_016780	1.59577	5.87855	179.596	5.93823e-41	8.21852e-38
Pdgfrb	NM_001146268	1.24284	6.51902	163.271	2.18251e-37	2.71853e-34
Gbp11	NM_001039647	3.645	2.91356	131.727	1.71692e-30	1.42573e-27
Il1rl1	NM_001025602	2.59213	3.70994	122.493	1.80027e-28	1.40151e-25
1700024P16Rik	NM_001162980	3.55526	2.63091	111.358	4.94032e-26	3.6198e-23
Nxph1	NM_008751	4.06247	1.63322	110.983	5.96821e-26	4.07354e-23
Als2cl	NM_001146059	1.00352	6.69964	110.903	6.21365e-26	4.07354e-23
Ern1	NM_023913	0.916608	7.51808	97.8446	4.52531e-23	2.20404e-20
Cpa3	NM_007753	2.03732	5.27881	97.812	4.60061e-23	2.20404e-20
Lif	NM_001039537	1.68453	3.60236	91.5985	1.06173e-21	4.7232e-19
Itga2b	NM_010575	0.994603	7.26489	81.7206	1.56749e-19	5.74254e-17
Ccr2	NM_009915	1.72033	3.53009	78.786	6.92176e-19	2.15544e-16
Fam189b	NM_001014995	0.947941	5.36712	75.6398	3.40435e-18	9.86152e-16
Maml3	NM_001004176	0.724976	6.69771	73.8838	8.2854e-18	2.19581e-15
Sema4a	NM_001163489	1.73579	3.31844	73.362	1.07925e-17	2.80067e-15
Bin1	NM_001083334	0.879947	6.15507	70.1412	5.52066e-17	1.34954e-14
Cd300c	NM_199225	5.71775	-0.335082	70.1395	5.52558e-17	1.34954e-14
Bpifc	NM_177772	1.12344	5.32635	66.7944	3.01355e-16	6.95125e-14
Pim1	NM_008842	0.782315	8.98652	64.0761	1.19703e-15	2.61584e-13
Tjp1	NM_001163574	1.31952	5.05131	62.3167	2.92428e-15	6.17369e-13
Ncr1	NM_010746	4.24563	0.682406	61.5816	4.24771e-15	8.81824e-13
Gbp9	NM_172777	1.77366	3.96142	61.4799	4.47279e-15	9.1333e-13
Plek	NM_019549	0.674603	8.47453	60.2023	8.55917e-15	1.69227e-12
Sytl4	NM_001290717	1.0187	5.42866	59.2586	1.38257e-14	2.64942e-12
Itpr2	NM_010586	0.698093	6.05651	59.0441	1.54174e-14	2.85818e-12
Myl10	NM_001085387	1.31735	7.03018	58.611	1.92141e-14	3.46857e-12
Cst7	NM_009977	1.41541	4.41736	58.4526	2.08248e-14	3.70563e-12
Lmo7	NM_201529	2.00626	3.12028	58.1808	2.39097e-14	4.14707e-12
Klrb1b	NM_030599	3.77187	1.11855	56.348	6.07165e-14	9.45356e-12
Klra7	NM_001110323	4.52301	-0.0471047	55.9996	7.24846e-14	1.10106e-11
Socs3	NM_007707	1.21032	6.31516	55.5119	9.28949e-14	1.3775e-11
Cebpa	NM_001287514	0.719071	6.38993	55.0008	1.20478e-13	1.7655e-11
Samd14	NM_146025	1.68069	4.39128	53.8484	2.16568e-13	3.06542e-11
Gbp8	NM_029509	1.60737	4.01072	52.872	3.56008e-13	4.76821e-11
Rmnd5b	NM_025346	0.763167	6.08563	52.819	3.65737e-13	4.8464e-11
Il2ra	NM_008367	3.78511	0.0305847	52.7173	3.85176e-13	5.05026e-11
Thbs1	NM_001313914	1.33945	6.30905	52.3697	4.5977e-13	5.90402e-11
Ldlrad4	NM_172631	0.898109	4.24502	51.531	7.04744e-13	8.86696e-11
F2r	NM_010169	0.902123	6.86552	51.1688	8.4753e-13	1.05568e-10
Tns1	NM_001289895	0.587993	7.88507	50.7951	1.02528e-12	1.26444e-10
Adam17	NM_001277266	0.68097	7.07045	49.4683	2.01599e-12	2.39154e-10
Mcf2l	NM_001159485	1.16827	3.75352	48.8133	2.81526e-12	3.24694e-10
Itgal	NM_001253872	0.725054	7.246	48.4162	3.44715e-12	3.90343e-10
Clec4e	NM_019948	0.762058	5.37686	47.9433	4.38733e-12	4.9233e-10
Id2	NM_010496	1.30289	3.31525	47.6769	5.02575e-12	5.53988e-10
Icos	NM_017480	1.66179	2.53505	46.9211	7.39031e-12	7.86783e-10
Slc18a2	NM_172523	0.570614	7.73703	46.4409	9.44253e-12	9.88371e-10
Klrd1	NM_010654	3.28506	0.660312	46.1112	1.11729e-11	1.14074e-09
Gbp10	NM_001039646	3.23287	1.67571	45.9166	1.23398e-11	1.24963e-09
Osm	NM_001013365	1.22824	4.52402	45.1519	1.82328e-11	1.77428e-09
Osbpl5	NM_001199227	0.719604	5.22112	44.9846	1.98593e-11	1.91758e-09
Eomes	NM_001164789	3.15933	-0.336745	44.155	3.03373e-11	2.80758e-09
Lag3	NM_008479	0.807692	5.00615	43.5447	4.14391e-11	3.76763e-09
Klre1	NM_153590	5.3962	-0.642907	42.8809	5.81759e-11	5.17599e-09
Fam84b	NM_001162926	0.622653	5.68116	42.8663	5.86124e-11	5.17784e-09
Slc22a3	NM_011395	0.69599	7.94043	42.7242	6.30263e-11	5.52856e-09
Mrc2	NM_008626	2.18845	1.49418	41.9856	9.19485e-11	7.95355e-09
Ccr5	NM_009917	2.24944	1.44665	41.4898	1.18487e-10	1.00399e-08
Lpcat2	NM_173014	0.866744	4.23541	41.2298	1.3534e-10	1.13141e-08
Rab27b	NM_001082553	0.749101	4.95157	40.5729	1.89418e-10	1.54208e-08
Nlrp3	NM_145827	2.82968	1.72499	40.4669	1.99973e-10	1.61744e-08
Gse1	NM_001145896	0.466509	8.3758	40.102	2.41038e-10	1.93701e-08
Cux1	NM_001291233	0.536092	9.34119	40.0009	2.53844e-10	2.02684e-08
Mfsd2b	NM_001033488	1.87386	5.28011	39.3412	3.55853e-10	2.73612e-08
Slco3a1	NM_001038643	0.56051	7.27201	39.2985	3.63719e-10	2.77944e-08
Klrk1	NM_001083322	2.96712	1.53015	39.2165	3.79324e-10	2.88101e-08
Ubash3a	NM_177823	0.880802	5.19489	39.0819	4.06389e-10	3.06786e-08
Gp5	NM_008148	1.39861	3.9938	39.0329	4.16714e-10	3.12686e-08
Mex3b	NM_175366	0.724097	4.83304	37.5688	8.82434e-10	6.35352e-08
Treml1	NM_001289451	1.82144	1.9424	37.2488	1.03978e-09	7.3588e-08
Klrc1	NM_001136068	3.03727	0.32242	36.9657	1.20224e-09	8.36598e-08
Gadd45g	NM_011817	1.64794	2.19694	35.6941	2.30866e-09	1.57328e-07
Ltb4r1	NM_008519	1.44103	2.3721	35.2865	2.84595e-09	1.89568e-07
Pf4	NM_019932	1.43102	3.19689	35.0869	3.15319e-09	2.08915e-07
Tap2	NM_011530	0.551711	8.48959	35.0483	3.21625e-09	2.11966e-07
Il2rb	NM_008368	3.01396	2.19572	34.9673	3.35283e-09	2.18061e-07
Nlrc3	NM_001081280	0.663193	5.29389	34.9336	3.41137e-09	2.20166e-07
Nol4l	NM_001001986	0.755036	5.31915	34.3407	4.62598e-09	2.91016e-07
Tespa1	NM_183264	0.556727	6.0082	34.2667	4.8053e-09	3.00778e-07
Cd96	NM_032465	0.627534	5.02866	33.7392	6.30177e-09	3.83252e-07
Cd226	NM_001039148	3.52937	-0.270739	33.7374	6.30753e-09	3.83252e-07
Inpp4b	NM_001024617	0.736986	5.06754	33.5344	7.0014e-09	4.21302e-07
Bace2	NM_019517	1.8417	1.57382	33.4385	7.35548e-09	4.36285e-07
Zfp462	NM_172867	1.01318	3.68355	33.1803	8.39956e-09	4.88902e-07
Muc13	NM_010739	0.449753	9.04364	32.2664	1.34416e-08	7.50798e-07
Hemgn	NM_053149	0.656285	5.61538	32.1128	1.45477e-08	8.08956e-07
Adamts14	NM_001081127	2.69319	0.326315	31.3459	2.1591e-08	1.1744e-06
Ltbp1	NM_019919	2.2731	0.146153	31.1933	2.33567e-08	1.25944e-06
Cxcl10	NM_021274	3.71233	3.75844	30.9083	2.70516e-08	1.43998e-06
Itgb6	NM_001159564	2.39949	0.718214	30.3056	3.69068e-08	1.94793e-06
5031439G07Rik	NM_001033273	0.500903	6.46533	30.1665	3.96498e-08	2.08388e-06
Pyhin1	NM_175026	1.82248	4.28508	30.1202	4.06076e-08	2.12524e-06
Nlrc5	NM_001033207	0.55665	7.57364	29.4716	5.67408e-08	2.93263e-06
Ccr9	NM_001166625	2.02387	2.64134	29.1425	6.72451e-08	3.4188e-06
Thbs2	NM_011581	1.67526	1.44848	29.0898	6.91008e-08	3.4847e-06
Tspan17	NM_028841	1.20867	2.73325	28.9365	7.47891e-08	3.74126e-06
Gas7	NM_001109657	2.22132	1.41898	28.8594	7.78259e-08	3.86215e-06
Ctsg	NM_007800	1.55237	6.0416	28.7993	8.02786e-08	3.93681e-06
Arap3	NM_001205336	1.16956	4.75381	28.7735	8.13554e-08	3.97397e-06
Hdc	NM_008230	2.24011	2.98511	28.7286	8.32657e-08	4.03563e-06
1810011H11Rik	NM_001163616	0.789128	4.27822	28.606	8.87058e-08	4.2661e-06
Tubb6	NM_026473	0.715318	4.32309	28.5354	9.20031e-08	4.40766e-06
F2rl2	NM_010170	1.6602	2.18929	28.4502	9.61417e-08	4.58828e-06
Ifi204	NM_008329	2.60697	2.74702	28.0992	1.15251e-07	5.47924e-06
Ifi47	NM_001271676	0.612688	7.00572	28.0301	1.19444e-07	5.657e-06
Chd5	NM_001081376	1.85975	0.753359	27.6529	1.45152e-07	6.77159e-06
Svil	NM_153153	0.415264	6.75126	27.3264	1.7185e-07	7.95748e-06
Bex6	NM_001033539	0.590339	5.42115	27.204	1.8308e-07	8.42562e-06
Clec2i	NM_001289706	0.930913	3.66497	27.1348	1.89749e-07	8.68939e-06
Mcpt8	NM_008572	1.55678	1.62242	27.1126	1.91944e-07	8.7018e-06
Ankrd27	NM_145633	0.423823	7.06978	27.0268	2.00658e-07	8.99065e-06
Il17re	NM_001034029	0.610008	5.02824	26.5801	2.52831e-07	1.10114e-05
Bcl9l	NM_030256	0.437027	6.80946	26.4004	2.77482e-07	1.20429e-05
H2-Ob	NM_010389	0.524932	6.97178	25.7291	3.92859e-07	1.65319e-05
Atp1b1	NM_009721	1.10202	2.9977	25.6967	3.99513e-07	1.67553e-05
Hk1	NM_001146100	0.444643	8.63498	24.9316	5.9401e-07	2.45813e-05
Isg15	NM_015783	1.57621	3.63676	24.909	6.01013e-07	2.47888e-05
Adgrg3	NM_173036	0.422215	7.85556	24.7651	6.4761e-07	2.6535e-05
Xcl1	NM_008510	3.87831	0.193183	24.5306	7.31391e-07	2.97719e-05
Anxa3	NM_013470	1.02893	3.48099	24.5152	7.37249e-07	2.99126e-05
Adgrl1	NM_181039	0.52888	6.04711	24.4837	7.49428e-07	3.0308e-05
Mpo	NM_010824	1.28448	9.73968	24.4383	7.67273e-07	3.09293e-05
Tle3	NM_001083927	0.439088	6.89309	24.4028	7.81547e-07	3.14031e-05
Nos1ap	NM_001109985	0.660214	4.33672	24.3622	7.98214e-07	3.18672e-05
Gm15915	NR_038017	2.59703	1.92811	24.3267	8.13023e-07	3.23547e-05
Tpcn1	NM_145853	0.42409	6.60636	24.1139	9.08018e-07	3.602e-05
Cd244	NM_018729	0.548826	5.67194	23.9013	1.01401e-06	3.99698e-05
Arntl	NM_001243048	0.573765	4.73223	23.7154	1.11685e-06	4.34733e-05
Hp	NM_017370	2.19823	2.41778	23.6407	1.16104e-06	4.47739e-05
Xdh	NM_011723	1.63592	2.39651	23.597	1.18775e-06	4.56623e-05
Mx1	NM_010846	1.91426	3.70636	23.5809	1.19772e-06	4.59042e-05
Car1	NM_001083957	2.11263	5.01297	23.4737	1.26634e-06	4.78144e-05
Sh2b2	NM_001302938	0.749185	3.84926	23.1221	1.52031e-06	5.66974e-05
Creb5	NM_172728	1.31588	1.77431	22.7557	1.83954e-06	6.60326e-05
Pde5a	NM_153422	0.695344	4.36617	22.5697	2.02652e-06	7.19937e-05
Elane	NM_015779	1.75442	5.13826	22.5676	2.02872e-06	7.19937e-05
Rab44	NM_001002786	1.36328	6.46808	22.5455	2.05227e-06	7.24661e-05
Myo7a	NM_001256081	0.613665	5.19921	22.5442	2.05367e-06	7.24661e-05
Ms4a4b	NM_021718	1.80095	1.98489	22.5202	2.07946e-06	7.31689e-05
Apaf1	NM_001042558	0.459523	6.71416	22.4816	2.12167e-06	7.42346e-05
Klri2	NM_177155	2.32464	-0.585165	22.4361	2.17258e-06	7.58028e-05
Kel	NM_032540	2.04209	1.4555	22.4006	2.21309e-06	7.70007e-05
Apol9a	NM_001162883	3.75226	-0.969309	22.3435	2.27988e-06	7.91034e-05
Rbm38	NM_019547	0.351959	7.1663	22.0817	2.61295e-06	8.96609e-05
Usp25	NM_013918	0.383356	7.70402	21.9263	2.83322e-06	9.66866e-05
Sh2d1b1	NM_012009	2.35542	-0.397639	21.9099	2.85758e-06	9.72514e-05
Gm1966	NM_001277179	0.478954	8.10028	21.8142	3.00366e-06	0.000101944
Samd5	NM_177271	2.71341	1.24765	21.5604	3.4285e-06	0.00011542
Plscr2	NM_001195084	1.52243	2.38988	21.4895	3.55771e-06	0.000119126
Gadd45a	NM_007836	0.656298	4.12051	20.8726	4.90856e-06	0.000161749
Jdp2	NM_001205052	0.546208	4.70768	20.8506	4.96541e-06	0.000162988
Gm6307	NR_045331	1.75212	0.268566	20.7558	5.21744e-06	0.000169039
Iigp1	NM_001146275	1.6425	6.482	20.7464	5.24297e-06	0.000169188
Gm4951	NM_001033767	1.60888	4.58963	20.499	5.96639e-06	0.00019154
Lilrb4a	NM_001291894	1.20144	2.12383	20.3299	6.51747e-06	0.000207626
Gfi1b	NM_001160406	0.896896	5.13049	20.2342	6.85158e-06	0.000216607
Txk	NM_001122754	2.72676	-0.780991	20.0438	7.56885e-06	0.000236285
Pydc4	NM_001033384	2.18017	2.08544	20.0267	7.63697e-06	0.000237815
Klrb1f	NM_153094	1.02528	2.56552	20.0109	7.70015e-06	0.000239185
Zfand5	NM_009551	0.355039	8.49245	19.9712	7.86166e-06	0.00024299
Rap1b	NM_024457	0.340441	8.17064	19.9539	7.93317e-06	0.000244593
Clec5a	NM_001038604	2.47994	0.520578	19.8444	8.40082e-06	0.000256472
Alox5	NM_009662	1.67961	1.77758	19.7088	9.01865e-06	0.000273324
Mta3	NM_001171052	0.36501	6.26281	19.2891	1.12344e-05	0.000334773
H2-Q5	NR_051981	0.475999	5.58415	19.0463	1.27588e-05	0.000376596
Btg2	NM_007570	0.473377	6.38848	19.0326	1.28504e-05	0.000377511
Tnik	NM_001163007	0.445578	5.65388	18.8608	1.40611e-05	0.000409218
Socs1	NM_001271603	1.10614	2.56105	18.7567	1.48503e-05	0.000431178
Tap1	NM_001161730	0.419641	8.20239	18.6975	1.53182e-05	0.000442699
Uhrf1bp1l	NM_029166	0.333151	6.82271	18.6075	1.60585e-05	0.000460886
Cap2	NM_026056	1.36066	1.37708	18.5939	1.61739e-05	0.000463132
Timp3	NM_011595	1.24395	3.04025	18.4911	1.70702e-05	0.000485448
Narf	NM_026272	0.514966	5.75292	18.2999	1.88715e-05	0.000531817
Mctp1	NM_030174	0.34044	6.65348	18.1464	2.04555e-05	0.00057386
Ltbp3	NM_008520	0.358381	7.47649	18.0723	2.12669e-05	0.000593947
Palm	NM_001161747	0.483222	5.57671	18.004	2.20436e-05	0.000611917
Runx1	NM_001111021	0.320105	7.66354	17.9815	2.23057e-05	0.000616054
Hes1	NM_008235	1.287	2.81642	17.9367	2.28373e-05	0.000627951
Aoah	NM_001281854	1.1178	2.08971	17.8537	2.38551e-05	0.000647362
Ubash3b	NM_176860	0.455507	5.30894	17.7791	2.48096e-05	0.000668892
Mnda	NM_001033450	2.3917	0.962332	17.7017	2.58398e-05	0.000692174
Fyb	NM_001278269	0.385758	7.26567	17.6597	2.64164e-05	0.000704587
Skap1	NM_001033186	2.04134	0.0144226	17.6011	2.72437e-05	0.000723555
Tspo	NM_009775	0.44918	6.10363	17.4351	2.97279e-05	0.000776292
Cdk6	NM_009873	0.430589	7.74387	17.3563	3.09875e-05	0.000802453
Cxcr2	NM_009909	1.28557	2.08036	17.2719	3.23934e-05	0.000835387
Hspa5	NM_001163434	0.421158	9.24078	17.2266	3.31758e-05	0.000850284
Ptms	NM_026988	0.37037	6.3888	16.9899	3.75798e-05	0.000951411
Bmp1	NM_009755	0.495404	5.27134	16.8884	3.96439e-05	0.000999604
Gm14085	NM_001085518	1.69542	0.242683	16.8099	4.13178e-05	0.00103552
Isg20	NM_001113527	1.00022	4.23745	16.747	4.2709e-05	0.00105973
Gimap9	NM_174960	0.518758	5.35197	16.5848	4.65228e-05	0.00114591
Gm12185	NM_001045540	1.50318	4.36168	16.5188	4.81697e-05	0.00118111
Gm7694	NM_001198955	0.559131	5.61754	16.4265	5.05723e-05	0.00123156
Capn1	NM_001110504	0.353188	6.3466	16.3917	5.15091e-05	0.00124582
Kif21b	NM_001039472	0.374194	7.15152	16.3877	5.16193e-05	0.00124607
Fndc3a	NM_207636	0.304808	7.62575	16.2944	5.42253e-05	0.00130392
Siglecf	NM_001271019	0.971699	3.19819	16.1823	5.75278e-05	0.00137245
Rasa4	NM_001039103	0.357952	6.66414	16.1089	5.98039e-05	0.00141889
Fam65a	NM_001081241	0.390551	8.22108	16.0352	6.21768e-05	0.00146405
Itm2c	NM_022417	0.371215	6.22218	16.0349	6.21871e-05	0.00146405
Mob1b	NM_026735	0.412521	5.16593	16.0233	6.25665e-05	0.00146766
Rsad2	NM_021384	1.22157	5.70243	15.9523	6.49594e-05	0.00151808
Tmem2	NM_001033759	0.434127	4.80468	15.9259	6.58708e-05	0.00153649
Sh2d2a	NM_001025571	2.2175	-0.187792	15.7808	7.11204e-05	0.00164661
Hyou1	NM_021395	0.372429	7.36396	15.6747	7.52217e-05	0.00172871
Kmt2d	NM_001033276	0.339335	8.85391	15.6609	7.5775e-05	0.00173822
Cd7	NM_009854	1.6721	1.12	15.5711	7.94608e-05	0.00181608
F10	NM_001242368	1.88466	-0.205078	15.5326	8.10938e-05	0.00185001
Ctla2a	NM_001145799	0.330698	9.14347	15.4675	8.39358e-05	0.00191134
Adgre5	NM_001163029	0.461158	5.62192	15.439	8.52104e-05	0.00193683
Gata1	NM_008089	1.12653	3.64107	15.4188	8.61268e-05	0.00195054
Fcgr3	NM_010188	1.50603	2.0322	15.3684	8.8453e-05	0.00199958
Stat2	NM_019963	0.570585	6.16384	15.3489	8.9371e-05	0.00201668
H2-Q4	NM_001143689	0.38655	8.51479	15.3071	9.13724e-05	0.0020544
Traf3ip2	NM_134000	0.48129	4.57177	15.237	9.48282e-05	0.00212061
Dnajc6	NM_001164583	0.311334	6.90152	15.2185	9.57624e-05	0.00213766
F830016B08Rik	NM_001101475	1.42019	3.42812	15.1775	9.78629e-05	0.00218064
Cecr6	NM_033567	0.981604	2.31498	15.0222	0.000106255	0.00235081
I830077J02Rik	NM_001033780	1.07755	2.1787	14.9878	0.000108206	0.00238552
Fgf3	NM_008007	0.805154	3.34781	14.966	0.000109463	0.00240472
Ifit3	NM_010501	2.00534	3.33334	14.9226	0.000112014	0.0024521
Tnfaip2	NM_009396	0.492022	5.37581	14.9112	0.000112695	0.00246267
Sema4d	NM_001281880	0.388178	7.14314	14.9058	0.000113014	0.0024643
Arhgap6	NM_001287530	0.429829	6.1556	14.8249	0.000117969	0.00255108
Ms4a4c	NM_029499	2.26495	1.30926	14.8146	0.000118613	0.00256057
Inpp5b	NM_008385	0.346982	6.62769	14.6145	0.000131898	0.00281323
Oasl1	NM_145209	1.0395	4.03114	14.5989	0.000132989	0.00283164
Fam65c	NM_001080708	1.4631	0.113933	14.5486	0.00013659	0.00289349
Fgd3	NM_015759	0.392902	5.45444	14.5313	0.000137848	0.00291024
Parp11	NM_181402	0.382686	5.61418	14.5092	0.000139473	0.00293956
Cxcl9	NM_008599	2.12993	0.926049	14.4961	0.000140453	0.00295521
Zbp1	NM_001139519	1.71723	4.57785	14.4512	0.000143837	0.00301623
B3gnt2	NM_001169114	0.34038	6.49211	14.4222	0.000146071	0.00304962
Stat1	NM_001205313	0.828552	7.61872	14.3868	0.000148842	0.00309387
Rbpms2	NM_028030	0.852899	3.02016	14.3015	0.000155742	0.00319066
Treml2	NM_001033405	0.300103	8.45606	14.2961	0.00015619	0.00319459
Edem1	NM_138677	0.331711	6.34015	14.2676	0.000158569	0.00323793
Slfn5	NM_183201	1.00783	5.95554	14.1561	0.00016825	0.00342438
Ikzf3	NM_011771	1.51786	1.03286	14.1104	0.000172384	0.00349709
Mir6236	NR_105744	0.534069	4.8419	14.0662	0.000176484	0.00356286
Slc7a8	NM_016972	0.403559	4.73846	14.0596	0.000177105	0.00356961
Sla	NM_001029841	0.480145	6.97624	14.0372	0.000179228	0.00360075
Pcdhb5	NM_053130	1.35638	1.22108	13.9884	0.000183944	0.00368361
Ifit1	NM_008331	1.46687	4.99624	13.9706	0.000185687	0.00371255
Lims1	NM_001193303	0.302142	8.04329	13.8794	0.000194922	0.00387851
Gimap3	NM_031247	0.986838	2.8226	13.8144	0.000201785	0.00397737
Cdk9	NM_130860	0.282631	7.02029	13.8142	0.000201806	0.00397737
Abca7	NM_013850	0.273815	7.76069	13.7575	0.000207985	0.00409267
Bhlhe40	NM_011498	0.705308	3.76371	13.7293	0.000211131	0.00414149
Psmb10	NM_013640	0.358799	6.40718	13.7171	0.000212506	0.00416191
Igtp	NM_018738	1.02962	6.03827	13.7059	0.000213781	0.00418031
Slc14a1	NM_001171010	0.485533	6.03301	13.6947	0.000215056	0.00419865
Chst11	NM_021439	0.314785	6.68221	13.5956	0.000226716	0.00441246
Pik3cd	NM_001029837	0.304741	7.91899	13.5821	0.000228349	0.00443713
Cd180	NM_008533	0.572939	5.20052	13.5683	0.000230043	0.00445633
Ddx6	NM_001110826	0.309344	9.23661	13.5246	0.000235455	0.00454701
Myh9	NM_022410	0.31799	9.97291	13.4432	0.000245899	0.00471945
Hspa1a	NM_010479	2.12328	-0.0127223	13.3931	0.000252546	0.00483957
Tspo2	NM_027292	2.19469	0.124376	13.3108	0.000263879	0.00501814
Herc6	NM_025992	0.457791	6.03313	13.3046	0.000264759	0.0050272
Psmb8	NM_010724	0.281323	7.88	13.2399	0.00027405	0.00519569
Hpse	NM_152803	0.749198	4.00536	13.2305	0.000275436	0.0052077
Cyb561	NM_007805	0.755754	2.82695	13.2013	0.000279755	0.00527974
Cyp11a1	NM_019779	1.01885	2.22521	13.1918	0.00028117	0.00529356
Slc45a3	NM_001177628	1.54662	1.8519	13.1907	0.000281337	0.00529356
Pecam1	NM_001032378	0.293829	6.88353	13.1706	0.000284377	0.00532662
Tuba8	NM_017379	0.9943	3.7762	13.1583	0.000286245	0.00535355
Serpina3f	NM_001033335	1.83006	4.38504	13.0895	0.000296961	0.00550439
Baiap3	NM_001163270	0.976473	2.08116	13.085	0.000297676	0.00550945
Itk	NM_001281965	1.22735	1.13272	13.0544	0.000302574	0.00559178
Fam117a	NM_172543	0.30874	7.78414	12.9979	0.000311849	0.00575464
Nlrc4	NM_001033367	0.854438	2.5323	12.9924	0.000312763	0.00575706
Usp18	NM_011909	1.24509	4.55374	12.9915	0.000312904	0.00575706
Golm1	NM_001035122	0.333659	6.05167	12.9139	0.000326154	0.0059656
Pgs1	NM_133757	0.37227	5.22873	12.88	0.000332106	0.00606556
Trabd	NM_026485	0.338708	5.90264	12.839	0.000339467	0.00617435
Flrt2	NM_201518	2.03975	-0.479439	12.8386	0.000339549	0.00617435
Twf2	NM_011876	0.364414	6.00305	12.8344	0.000340307	0.00617911
Cd69	NM_001033122	0.626695	5.97665	12.7839	0.000349608	0.00632954
Micall2	NM_174850	0.440252	5.65169	12.7092	0.000363864	0.00655904
Tmem71	NM_172514	0.374888	5.70994	12.6383	0.000377919	0.00679272
Rasgrp2	NM_011242	0.26604	7.12302	12.547	0.000396852	0.00708194
Hspa1b	NM_010478	2.32658	0.895344	12.5405	0.000398231	0.00709637
Ap3s1	NM_001303015	0.531005	5.41813	12.4957	0.000407895	0.0072582
Slc13a2	NM_022411	1.51283	0.248714	12.3837	0.000433101	0.00768477
Lax1	NM_001159649	0.451957	6.15449	12.3316	0.000445357	0.00787978
Gbp2	NM_010260	0.773205	6.46973	12.3042	0.000451939	0.00797248
Manf	NM_029103	0.415898	6.08946	12.2694	0.000460439	0.00807778
Hsf2bp	NM_028902	1.21525	0.891009	12.1849	0.000481786	0.00843444
Irf1	NM_001159393	0.526541	7.31463	12.1836	0.000482123	0.00843444
Bahd1	NM_001045523	0.33782	5.69206	12.1621	0.000487692	0.0085199
Mgam	NM_001171003	1.80598	0.603824	12.1227	0.000498124	0.00868997
Fry	NM_172887	0.366774	5.69698	12.1165	0.000499778	0.00870662
Tes	NM_011570	0.260815	7.38804	12.097	0.00050502	0.00878565
Arpp21	NM_001177615	0.982174	2.71545	12.0604	0.000515054	0.00894771
Pbx1	NM_001291508	0.273942	7.53164	12.0009	0.000531759	0.00921223
Luc7l3	NM_026313	0.27023	7.80808	11.9852	0.000536235	0.0092765
Txndc11	NM_029582	0.362454	5.45277	11.9699	0.000540659	0.00932748
Plxdc2	NM_026162	0.382259	4.96202	11.9529	0.000545624	0.00938714
Gm12250	NM_001135115	0.931856	5.77628	11.9283	0.000552868	0.00949865
Slc2a6	NM_001177627	1.70436	1.13114	11.8312	0.000582459	0.00997952
Ermap	NM_013848	1.68707	3.35795	11.8232	0.000584982	0.0100065
Mycn	NM_008709	0.41946	6.22676	11.821	0.000585657	0.0100065
Nxpe2	NM_030069	1.31563	0.948377	11.8185	0.000586442	0.0100065
Cited4	NM_019563	1.85339	-0.0745316	11.8106	0.000588939	0.0100216
Cmpk2	NM_020557	0.964057	5.87658	11.7926	0.000594676	0.0101054
Fes	NM_010194	0.28582	6.75947	11.7719	0.000601328	0.0101768
Map3k5	NM_008580	0.332125	5.85853	11.7014	0.000624537	0.0105125
Trps1	NM_001310481	0.429661	4.52589	11.5832	0.00066551	0.0111121
Gzmb	NM_013542	1.47775	1.23991	11.5741	0.000668778	0.0111477
Hspa13	NM_030201	0.334615	6.01867	11.5112	0.000691767	0.0114431
Klhl6	NM_183390	0.275647	7.37623	11.5068	0.00069341	0.0114551
Pten	NM_008960	0.283741	8.52614	11.4616	0.000710483	0.011676
Ifi44	NM_133871	0.893798	6.11617	11.4358	0.000720429	0.011823
Rasgrp1	NM_011246	1.77577	0.214184	11.4064	0.000731915	0.0119799
Rn45s	NR_046233	0.503542	11.0522	11.3992	0.000734776	0.012011
Irgm1	NM_008326	0.728233	6.92242	11.3693	0.000746669	0.0121575
Dock8	NM_028785	0.25483	8.50614	11.3142	0.000769173	0.0124913
Nedd9	NM_001111324	0.404619	4.96929	11.2835	0.00078201	0.0126175
Klf1	NM_010635	1.21874	2.18029	11.2607	0.000791649	0.0127236
Ugcg	NM_011673	0.281769	6.57854	11.1679	0.000832245	0.0133245
Clca3a1	NM_009899	1.03949	3.10254	11.1495	0.000840535	0.0134168
Fbxl19	NM_172748	0.273	6.32002	11.148	0.000841244	0.0134168
Tspan13	NM_025359	0.302913	8.23713	11.0605	0.000881886	0.0139933
Ntng2	NM_001305805	0.459177	4.03569	11.0079	0.000907251	0.0143592
Slc12a6	NM_133648	0.257777	8.27022	10.9621	0.000929933	0.0146438
Ehd4	NM_133838	0.328238	6.79129	10.9329	0.000944721	0.0148018
Tmem184b	NM_001253817	0.363827	5.27859	10.8591	0.000983106	0.0152688
Igsf6	NM_030691	1.19119	2.89585	10.7563	0.00103924	0.0160604
Hras	NM_001130443	0.387455	4.61362	10.7491	0.00104331	0.0160835
Pydc3	NM_001162938	1.74847	1.78162	10.72	0.00105984	0.0162779
Stat3	NM_011486	0.281902	8.12877	10.6226	0.00111713	0.0169902
Cttn	NM_001252572	0.320315	5.72434	10.5795	0.00114346	0.0173271
Ms4a2	NM_001276328	1.26905	1.5237	10.5442	0.00116552	0.0175972
Gm15800	NM_181421	0.264833	7.49343	10.5241	0.00117829	0.0177685
Stt3b	NM_024222	0.248055	7.86904	10.5015	0.0011928	0.0179438
Rreb1	NM_001013392	0.239951	7.44271	10.4918	0.00119907	0.0180165
Nfkbib	NM_001306222	0.437416	4.17613	10.4216	0.00124548	0.0185907
Ms4a3	NM_133246	1.10565	2.83594	10.4061	0.00125603	0.0186897
Tet3	NM_183138	0.259909	7.44219	10.4041	0.00125738	0.0186897
Oas1a	NM_145211	0.593152	5.36207	10.3574	0.00128955	0.0190578
Madd	NM_001177719	0.279404	7.58537	10.3571	0.0012898	0.0190578
Qrfp	NM_183424	1.43612	-0.00405807	10.3376	0.00130349	0.0192145
Arhgef1	NM_001130150	0.249658	8.56049	10.3265	0.00131135	0.0193075
Ralb	NM_022327	0.435407	4.0731	10.3042	0.00132728	0.0194959
Mylk3	NM_001297612	1.44003	1.04689	10.2998	0.00133048	0.0195199
Cdr2	NM_007672	1.27679	0.159121	10.2812	0.00134395	0.0196482
Lat2	NM_020044	0.310774	5.97324	10.2741	0.00134913	0.0196977
B3galt5	NM_001122993	1.28184	0.371731	10.2722	0.0013505	0.0196977
2510039O18Rik	NM_029841	0.277724	6.23044	10.2567	0.00136191	0.0198203
Atp6v0a2	NM_011596	0.260937	6.73024	10.2564	0.00136209	0.0198203
Mefv	NM_001161790	1.6977	-0.174313	10.2462	0.00136966	0.0198841
Baz1a	NM_013815	0.300434	7.37947	10.2086	0.00139786	0.0202326
Ikzf2	NM_011770	0.264876	7.24377	10.1882	0.00141346	0.0203303
Vimp	NM_024439	0.391791	4.77743	10.1688	0.00142837	0.0205211
Plekhg5	NM_001004156	0.41956	4.52086	10.1644	0.00143176	0.020546
Sec61a1	NM_016906	0.242554	7.7115	10.1609	0.00143452	0.020562
Ppif	NM_134084	0.269803	6.56053	10.1544	0.00143955	0.0206104
Rrbp1	NM_024281	0.235841	7.8022	10.1421	0.00144919	0.0207008
Mtss1	NM_001146180	0.307365	5.80428	10.1172	0.0014689	0.0209583
Csf1r	NM_001037859	0.927675	3.95464	10.1039	0.00147953	0.0210859
Zyx	NM_001289617	0.254176	8.42783	10.0439	0.00152852	0.0216109
Nt5c3	NM_001252374	0.294595	6.58877	10.0367	0.00153453	0.0216468
Plac8	NM_139198	0.49638	8.60641	10.0135	0.00155397	0.0218468
Vps37c	NM_181403	0.323153	5.20293	10.0022	0.00156353	0.0219565
Cxcr6	NM_030712	1.27783	0.185156	9.98955	0.00157431	0.022058
Ctsw	NM_009985	0.463209	3.88284	9.94897	0.00160939	0.022499
Stk11	NM_001301853	0.233539	7.27914	9.94422	0.00161356	0.0225067
Bbx	NM_027444	0.257408	7.13464	9.92626	0.00162937	0.0226964
Oas2	NM_145227	0.965527	6.00457	9.89631	0.00165611	0.0230229
Phf11c	NM_001164289	1.01299	2.28714	9.86691	0.00168277	0.0233155
Nhsl1	NM_001163592	0.453516	3.98995	9.85941	0.00168965	0.0233848
Cyth4	NM_028195	0.314092	6.15439	9.84706	0.00170104	0.0234902
Lmo4	NM_001161769	0.302439	5.79577	9.83887	0.00170862	0.0235688
Trem1	NM_021406	1.39414	1.2042	9.78239	0.00176191	0.0241434
Abcg3	NM_030239	0.554201	5.03621	9.74958	0.00179364	0.0245471
Cds2	NM_001291039	0.273631	7.26587	9.74786	0.00179531	0.0245471
Psd3	NM_027626	0.291131	6.12719	9.74021	0.0018028	0.0245955
Nin	NM_001081453	0.246298	7.32424	9.73278	0.00181011	0.0246195
Cldn15	NM_021719	1.78495	-0.16771	9.70571	0.00183696	0.0249229
Pttg1ip	NM_145925	0.246965	6.93369	9.69194	0.00185078	0.025058
Sec61b	NM_024171	0.299361	5.93919	9.66564	0.00187747	0.0253641
H2-Ab1	NM_207105	0.435477	5.64294	9.64897	0.00189457	0.0255398
Vit	NM_001197028	1.49463	0.913548	9.59817	0.00194771	0.026143
Tef	NM_017376	0.313514	5.60936	9.57872	0.00196846	0.0262995
Pla2r1	NM_008867	1.41415	-0.393203	9.57854	0.00196865	0.0262995
Atad2b	NM_001099628	0.2404	6.80081	9.55654	0.00199238	0.0265707
Ppm1b	NM_001159496	0.24912	6.51782	9.54977	0.00199974	0.0266404
Trim21	NM_001082552	0.361741	5.42597	9.50669	0.00204724	0.0271859
Grap	NM_027817	1.12578	1.22519	9.48314	0.00207369	0.0274203
Ryr3	NM_001319156	1.11649	1.24443	9.4648	0.00209452	0.0275972
Abtb1	NM_030251	0.322363	5.37417	9.46379	0.00209568	0.0275972
Aqp1	NM_007472	0.866112	4.73113	9.46145	0.00209836	0.0275999
Cd48	NM_007649	0.419098	6.1078	9.44272	0.00211988	0.0278243
Irf8	NM_001301811	0.658328	5.49772	9.41838	0.00214821	0.0281665
Mmd	NM_026178	0.323231	5.25944	9.39467	0.00217617	0.0284134
Vmn2r84	NM_001081448	1.04294	1.35506	9.35848	0.00221957	0.0289155
Sbno2	NM_183426	0.247156	7.25348	9.35681	0.00222159	0.0289155
Gp1bb	NM_001001999	1.33192	0.646906	9.32366	0.00226213	0.0293206
Cmip	NM_001163262	0.262482	7.4979	9.30732	0.0022824	0.029469
Znfx1	NM_001033196	0.372708	5.97782	9.30681	0.00228304	0.029469
Serpine2	NM_009255	1.36909	1.52016	9.27215	0.00232664	0.0298743
Syk	NM_001198977	0.224875	8.38593	9.267	0.0023332	0.0298995
Tpst2	NM_009419	0.334754	6.10585	9.24533	0.00236097	0.0302243
Slc9a2	NM_001033289	0.936674	1.55606	9.19674	0.00242446	0.0308784
Tnfaip8	NM_001177759	0.252948	7.53355	9.18702	0.00243737	0.0309636
Glrx5	NM_028419	0.31257	5.57713	9.17309	0.002456	0.0311527
Gm4841	NM_001034859	0.938979	3.8469	9.16332	0.00246915	0.0312876
Oasl2	NM_011854	0.747204	6.7933	9.14071	0.00249984	0.0315801
Ago2	NM_153178	0.244158	7.20685	9.12387	0.00252296	0.0317755
Chad	NM_007689	0.813614	2.22524	9.11148	0.00254011	0.0319592
Slc35e3	NM_029875	0.329253	4.74804	9.10553	0.00254838	0.0320309
Tmsb10	NM_001039392	0.277199	7.03895	9.05468	0.00262024	0.0328347
Irf7	NM_001252600	1.07108	5.43735	9.0474	0.00263068	0.0329324
Apol9b	NM_001168660	1.61206	0.739657	9.02869	0.00265775	0.0332379
Pafah2	NM_001285872	0.248091	6.44857	9.02009	0.00267028	0.0333611
Elf1	NM_001286411	0.22878	8.79544	9.01303	0.00268061	0.0334231
2018-09-08	NM_001252332	0.290547	6.29737	8.99281	0.00271044	0.0337275
Trim58	NM_001039047	0.544347	3.64319	8.96697	0.00274904	0.0341056
Spns2	NM_001276383	0.235412	8.93665	8.96426	0.00275313	0.0341224
Ier3	NM_133662	0.33036	6.03551	8.95429	0.00276819	0.0342641
Trim12a	NM_023835	0.346014	5.6508	8.95247	0.00277095	0.0342641
Gimap4	NM_001243199	0.925218	2.37008	8.95124	0.00277281	0.0342641
Gp1ba	NM_010326	0.548266	3.19981	8.94881	0.0027765	0.0342756
H2-T24	NM_008207	0.81874	4.43989	8.93056	0.00280439	0.0345172
Gbp7	NM_001083312	0.470816	7.64233	8.89465	0.00286007	0.0350319
Sipa1l1	NM_001167983	0.258106	7.094	8.89273	0.00286308	0.0350319
Slc22a4	NM_019687	0.987923	1.44041	8.88626	0.00287324	0.0351218
Ino80d	NM_001081436	0.249748	7.86576	8.87536	0.00289045	0.0352629
Dynlt1a	NM_001166629	0.805526	2.406	8.84307	0.00294204	0.0357871
Tgfb1	NM_011577	0.294508	8.08432	8.81929	0.00298063	0.0361507
Afap1	NM_027373	0.630114	3.0142	8.81141	0.00299352	0.0362504
2210010C04Rik	NM_023333	1.26725	-0.104766	8.78342	0.0030398	0.0366542
Pi16	NM_023734	0.960777	1.74262	8.76724	0.00306688	0.0369093
Stab2	NM_138673	1.76424	1.79297	8.75946	0.00308	0.03696
Esam	NM_027102	0.297054	5.49767	8.74699	0.00310113	0.0371777
Cd1d1	NM_007639	0.279602	6.05586	8.72598	0.00313708	0.0374644
Slc15a2	NM_001145899	1.19585	5.18941	8.68003	0.00321716	0.038274
Mafk	NM_010757	0.256145	6.28915	8.62484	0.0033161	0.0390779
Csgalnact2	NM_030165	0.285028	6.98461	8.55723	0.00344153	0.0404795
Hpn	NM_001110252	1.04922	1.25879	8.55276	0.00345	0.0405407
Boll	NM_001113367	1.19663	-0.169601	8.54496	0.0034648	0.0406314
2310036O22Rik	NM_026760	0.242194	6.54641	8.54354	0.0034675	0.0406314
Stx3	NM_001025307	0.357141	4.97417	8.53702	0.00347995	0.0407389
Tmf1	NM_001081111	0.257939	6.10843	8.49596	0.00355935	0.0414736
Tfrc	NM_011638	0.251096	6.88323	8.46162	0.00362718	0.0421125
Cry1	NM_007771	0.33181	4.9025	8.46136	0.00362771	0.0421125
Parp16	NM_177460	0.382756	4.32557	8.41589	0.00371955	0.0430583
Cope	NM_021538	0.267456	6.23735	8.41278	0.00372593	0.0430921
Gata2	NM_008090	0.260558	7.93598	8.39283	0.00376703	0.0434644
Ndrg2	NM_001145959	0.420527	3.99888	8.39039	0.00377211	0.0434644
Emid1	NM_080595	0.383269	5.25521	8.38937	0.00377422	0.0434644
Bax	NM_007527	0.333575	4.97452	8.38872	0.00377557	0.0434644
Dgkd	NM_177646	0.229488	7.35903	8.38497	0.00378336	0.0435139
Adgrg1	NM_001198894	0.271959	11.1564	8.36805	0.00381875	0.0438804
F5	NM_007976	0.46732	3.78001	8.35836	0.00383917	0.0440744
Trem3	NM_021407	1.41778	0.0281777	8.35433	0.00384769	0.0440909
Atp8b2	NM_001081182	0.244058	6.61654	8.31946	0.00392227	0.0447891
Metap1	NM_175224	0.258945	5.90815	8.31245	0.00393742	0.0449125
Klhl30	NM_027551	1.08167	0.782519	8.30193	0.00396029	0.0451321
Fryl	NM_028194	0.21579	7.58523	8.22913	0.00412233	0.0465951
Alas1	NM_001291835	0.368799	5.42737	8.22237	0.00413771	0.0466842
Tcf7	NM_001313981	0.98019	1.97376	8.2058	0.00417567	0.0469001
Cxcl2	NM_009140	0.809458	2.04302	8.1774	0.00424155	0.0473837
Hivep2	NM_010437	0.312546	4.93468	8.16654	0.00426702	0.0475828
Zbtb10	NM_177660	0.317375	5.35408	8.15042	0.00430513	0.0479648
Hpgds	NM_019455	0.604761	3.70732	8.11958	0.00437896	0.0487003
Gdf11	NM_010272	1.13749	0.650634	8.11639	0.00438668	0.0487426
Tex2	NM_198292	0.244971	6.59053	8.11253	0.00439604	0.0488031
Tnrc6b	NM_144812	0.216388	7.67833	8.09787	0.00443173	0.0491555
Foxo3	NM_019740	0.248289	7.2126	8.07282	0.00449342	0.0497525
Specc1	NM_001029936	0.325712	4.82466	8.07277	0.00449354	0.0497525
Pcmt1	NM_008786	0.236157	6.27122	8.05921	0.00452728	0.0499485

## Sheet: ST9
Supplementary Table S9: Down-regulated genes in RNA-seq of SKO LSK cells (vs WT, edgeR; FDR < 0.05)
Symbol	RefSeqID	logFC	logCPM	LR	PValue	FDR
Mc5r	NM_013596	-2.02474	4.5628	256.558	9.65572e-58	3.00679e-54
Gm2a	NM_010299	-1.69891	7.05753	255.979	1.2915e-57	3.21738e-54
Slc16a11	NM_001114970	-2.91481	3.62364	252.721	6.62569e-57	1.37549e-53
Gria3	NM_001281929	-1.7244	5.08616	195.303	2.2123e-44	3.93663e-41
Stag2	NM_001077712	-1.25094	8.12484	162.861	2.68269e-37	3.03778e-34
Myof	NM_001099634	-1.91449	5.83659	140.248	2.34981e-32	2.4391e-29
Sdc1	NM_011519	-2.2121	4.14392	136.933	1.24692e-31	1.19474e-28
Shisa8	NM_001207021	-2.20311	4.61263	132.459	1.18708e-30	1.05616e-27
Micu1	NM_001291442	-1.07529	5.18388	105.256	1.07327e-24	6.68433e-22
Mrc1	NM_008625	-4.76287	2.7443	101.712	6.42217e-24	3.73626e-21
Egfl7	NM_001164564	-0.940838	6.08957	101.658	6.59905e-24	3.73626e-21
Clic5	NM_172621	-1.39095	4.56599	99.9057	1.59828e-23	8.65571e-21
Hmox1	NM_010442	-3.24825	3.12108	99.0252	2.49308e-23	1.29391e-20
Armcx4	NM_001202500	-1.38501	4.80352	96.0498	1.12029e-22	5.16826e-20
Slc8a1	NM_001112798	-1.2187	4.53546	87.8827	6.94549e-21	2.98321e-18
Gas6	NM_019521	-1.9935	3.65821	87.3832	8.9408e-21	3.71222e-18
Gfi1	NM_001267621	-1.25492	4.79168	86.3397	1.51538e-20	6.08889e-18
Ddx4	NM_001145885	-1.40468	3.9156	83.2198	7.34204e-20	2.85789e-17
Fcna	NM_007995	-5.40972	1.61888	81.9424	1.40114e-19	5.28866e-17
Ddah2	NM_001190449	-1.31972	4.28704	81.6003	1.66585e-19	5.92851e-17
Col4a2	NM_009932	-0.927185	6.06449	81.0308	2.22225e-19	7.68898e-17
Fgfr1	NM_001079908	-1.79699	3.37595	80.8811	2.39712e-19	8.06988e-17
Ifitm1	NM_001112715	-1.07257	6.70282	80.5623	2.81681e-19	9.2332e-17
Cnn3	NM_028044	-2.10008	3.51267	79.5864	4.61594e-19	1.47426e-16
Serpinf1	NM_011340	-1.09028	5.19328	77.3282	1.44784e-18	4.39859e-16
Fgl2	NM_008013	-1.13608	5.71919	77.0702	1.64989e-18	4.89309e-16
Mamdc2	NM_174857	-1.33556	4.10981	75.3524	3.93775e-18	1.11474e-15
C1qc	NM_007574	-4.44866	1.68772	74.853	5.07105e-18	1.40367e-15
Col4a1	NM_009931	-0.873669	6.05383	73.9898	7.85221e-18	2.12624e-15
B3gnt5	NM_001159407	-1.08234	6.43467	71.5863	2.65398e-17	6.74653e-15
Vcam1	NM_011693	-3.97674	3.03919	67.8965	1.72304e-16	4.12734e-14
P2ry2	NM_001302346	-1.15688	4.10896	67.7437	1.86192e-16	4.37586e-14
Coro7	NM_030205	-0.652442	7.9019	64.7208	8.63004e-16	1.95447e-13
Glipr2	NM_027450	-1.04769	4.60278	64.2999	1.06849e-15	2.37663e-13
Cyp2j6	NM_010008	-1.07646	4.87616	63.2051	1.86264e-15	4.00019e-13
Itih5	NM_172471	-0.661867	8.22002	60.6496	6.81956e-15	1.37007e-12
Paqr5	NM_028748	-1.37179	4.51349	59.3769	1.30187e-14	2.53377e-12
C1qb	NM_009777	-4.42933	1.31777	59.0558	1.53267e-14	2.85818e-12
5930403L14Rik	NR_045643	-1.1315	4.71237	59.0205	1.56034e-14	2.85818e-12
Fchsd2	NM_001146010	-0.62185	7.25681	58.1758	2.39715e-14	4.14707e-12
Bgn	NM_007542	-1.34546	3.98475	58.1101	2.47848e-14	4.22904e-12
Fgf11	NM_001291104	-1.88092	2.55383	57.9088	2.74554e-14	4.59044e-12
Aplp2	NM_001102455	-0.631682	6.59308	57.8956	2.76399e-14	4.59044e-12
Mpzl1	NM_001001880	-1.20449	3.82963	57.5397	3.31224e-14	5.42858e-12
Siglec1	NM_011426	-4.24812	0.91701	57.2088	3.9191e-14	6.33978e-12
Pde3b	NM_011055	-1.05886	4.65103	57.0726	4.20014e-14	6.70731e-12
Cd163	NM_001170395	-0.966578	4.97853	56.6122	5.30815e-14	8.3694e-12
Myo5c	NM_001081322	-1.22478	4.09913	56.1855	6.59475e-14	1.01413e-11
Ndn	NM_010882	-1.52975	3.10969	55.8284	7.90826e-14	1.18681e-11
Samsn1	NM_023380	-0.798326	7.22947	54.9383	1.24375e-13	1.80141e-11
Procr	NM_011171	-1.24402	4.68784	54.1501	1.8574e-13	2.65928e-11
Pcp4l1	NM_025557	-1.12546	5.61678	53.7135	2.31967e-13	3.2465e-11
Adam11	NM_001110778	-0.822455	5.19486	53.4511	2.65106e-13	3.66907e-11
Lrrc49	NM_001146046	-0.809555	5.0952	53.331	2.81821e-13	3.85754e-11
Ccnd1	NM_007631	-0.937628	5.37527	53.0455	3.25918e-13	4.41265e-11
Fam181b	NM_021427	-2.16457	1.80595	52.6756	3.93444e-13	5.10494e-11
C1qa	NM_007572	-4.11386	1.46965	51.6064	6.78209e-13	8.62018e-11
Lpl	NM_008509	-2.48635	1.96446	50.7129	1.06916e-12	1.30564e-10
Edar	NM_010100	-2.52222	1.56505	49.8567	1.65391e-12	2.0001e-10
Flnb	NM_001081427	-0.636997	6.32155	49.489	1.99485e-12	2.38922e-10
Hmga2	NM_010441	-1.24607	4.54502	49.3446	2.14727e-12	2.52325e-10
Adgre1	NM_010130	-3.46145	0.892893	49.1144	2.41462e-12	2.81089e-10
Flt3	NM_010229	-0.714479	8.96913	48.6751	3.02075e-12	3.45197e-10
Igf1	NM_001111274	-2.80326	0.804758	47.8491	4.60322e-12	5.11944e-10
Hk3	NM_001033245	-0.976467	6.49516	47.4556	5.62647e-12	6.14766e-10
Cd24a	NM_009846	-0.565683	8.19435	47.4227	5.72151e-12	6.19714e-10
Chp2	NM_027363	-6.18277	-0.776617	47.1472	6.58491e-12	7.07083e-10
Tmem215	NM_001166009	-3.13265	0.603971	46.846	7.67896e-12	8.10586e-10
Fstl1	NM_008047	-1.23868	3.92414	46.3788	9.74634e-12	1.01167e-09
Etv5	NM_023794	-0.87432	4.92458	46.2173	1.05839e-11	1.08953e-09
Clec1a	NM_175526	-1.64716	2.84126	45.6415	1.41998e-11	1.4264e-09
Bend4	NM_001164806	-0.911642	4.41383	45.5193	1.51142e-11	1.5061e-09
Peg13	NR_002864	-0.553468	7.55746	45.3825	1.62077e-11	1.60224e-09
5031414D18Rik	NM_198642	-1.67636	2.6469	45.3361	1.65966e-11	1.62777e-09
Ptger3	NM_011196	-0.968423	4.24357	44.7918	2.19141e-11	2.09971e-09
Hlf	NM_172563	-0.741025	9.11234	44.6691	2.33306e-11	2.21837e-09
Wdr35	NM_001159527	-1.50368	2.89878	44.4214	2.64772e-11	2.49849e-09
Igf2r	NM_010515	-1.00601	5.79596	44.3655	2.72453e-11	2.55163e-09
Scube3	NM_001004366	-1.34254	3.88811	44.1491	3.0429e-11	2.80758e-09
Synpo2	NM_080451	-2.09389	2.76384	43.8147	3.60976e-11	3.30611e-09
Lamb2	NM_008483	-1.92855	2.24527	43.1925	4.96096e-11	4.47781e-09
Rian	NR_028261	-2.5927	1.47175	42.9389	5.64751e-11	5.06082e-09
Kcnk12	NM_199251	-0.770643	4.83839	42.2855	7.8874e-11	6.87031e-09
Fam198b	NM_133187	-2.59445	0.786305	41.8475	9.86787e-11	8.47684e-09
Galnt6	NM_001161767	-0.525958	7.20802	41.8277	9.96837e-11	8.50452e-09
Slc40a1	NM_016917	-2.10526	2.94127	41.352	1.2714e-10	1.07003e-08
Itga2	NM_008396	-1.41578	3.19315	40.9498	1.56193e-10	1.29624e-08
P2rx7	NM_001038839	-1.29078	3.97673	40.938	1.57139e-10	1.29624e-08
Plp2	NM_019755	-0.649193	5.88526	40.6373	1.83271e-10	1.50186e-08
Uaca	NM_028283	-0.997766	3.56702	39.8959	2.67866e-10	2.12519e-08
Dmxl2	NM_172771	-0.865906	5.2176	39.845	2.74931e-10	2.16743e-08
Tpm4	NM_001001491	-1.24677	4.45297	39.4733	3.32571e-10	2.60535e-08
Tgfbr3	NM_011578	-1.07184	4.31852	39.4489	3.36751e-10	2.62161e-08
Selp	NM_011347	-0.883204	5.44542	39.4253	3.40845e-10	2.637e-08
Lima1	NM_001113545	-0.887255	3.88739	38.4306	5.67364e-10	4.23179e-08
Rassf4	NM_178045	-0.637463	5.5381	37.9986	7.07971e-10	5.2491e-08
Serpinb1a	NM_025429	-0.493189	7.23176	37.6882	8.30058e-10	6.11787e-08
Cd5l	NM_009690	-3.69128	0.542104	37.6571	8.43388e-10	6.17956e-08
Osbpl1a	NM_001252489	-0.534895	7.04202	37.6265	8.56746e-10	6.24072e-08
Adam22	NM_001007220	-0.989832	4.74459	37.5975	8.69565e-10	6.29727e-08
Itga9	NM_001113514	-1.08749	4.11482	37.3607	9.81816e-10	7.02845e-08
Csrnp3	NM_001290665	-3.11895	0.157285	37.3309	9.9692e-10	7.09579e-08
Hpgd	NM_008278	-3.59532	0.0262082	37.2155	1.05772e-09	7.44351e-08
Apcdd1	NM_133237	-1.4149	2.82788	37.0867	1.12991e-09	7.90684e-08
Slc27a2	NM_011978	-2.353	0.851181	36.0256	1.94742e-09	1.34762e-07
Prdm16	NM_001177995	-0.93662	5.18361	35.9499	2.02454e-09	1.39324e-07
Clec10a	NM_001204252	-1.75975	2.21508	35.6917	2.31143e-09	1.57328e-07
Axl	NM_001190974	-1.38775	4.13907	35.5841	2.44279e-09	1.65366e-07
Actn1	NM_134156	-0.61081	5.36981	35.5297	2.51196e-09	1.6913e-07
Pak1	NM_011035	-0.465047	6.58394	35.4143	2.66527e-09	1.78487e-07
Cmah	NM_001111110	-0.978815	4.13083	34.9885	3.31662e-09	2.17431e-07
Stard10	NM_019990	-0.592294	5.55814	34.9625	3.36125e-09	2.18061e-07
Meg3	NM_144513	-2.10445	2.4789	34.8276	3.60232e-09	2.31291e-07
Osbpl3	NM_001163645	-0.60537	5.61091	34.7185	3.81003e-09	2.43373e-07
Cobll1	NM_027225	-0.655065	5.7037	34.4082	4.46847e-09	2.83976e-07
Cep164	NM_001081373	-0.729306	4.65894	34.3765	4.54182e-09	2.87172e-07
Tspan2	NM_001243132	-0.625299	5.24047	34.256	4.83194e-09	3.00933e-07
Ephb2	NM_001290753	-1.26668	3.14413	34.2419	4.86687e-09	3.01601e-07
Paqr8	NM_028829	-0.735104	5.13101	34.0395	5.40047e-09	3.33011e-07
Rcn3	NM_026555	-0.681998	4.92707	33.9675	5.60417e-09	3.43869e-07
Gsta4	NM_010357	-1.34476	2.88364	33.6176	6.7082e-09	4.05618e-07
Trim47	NM_001205081	-0.736672	4.70934	33.4763	7.21361e-09	4.31984e-07
Cenpv	NM_028448	-1.15793	3.11793	33.4445	7.33278e-09	4.36285e-07
Gjb3	NM_001160012	-2.16525	1.56018	33.3714	7.61367e-09	4.49459e-07
Il27ra	NM_016671	-0.610349	5.22627	33.2858	7.95602e-09	4.67454e-07
Slc16a9	NM_025807	-1.09385	3.51016	33.2122	8.26319e-09	4.83222e-07
Myo5a	NM_010864	-0.457388	7.81375	32.6933	1.0791e-08	6.2342e-07
Fcgrt	NM_010189	-1.11856	3.53663	32.6897	1.08108e-08	6.2342e-07
Mafb	NM_010658	-2.78759	0.106678	32.6058	1.12877e-08	6.47922e-07
Csgalnact1	NM_001252623	-0.546951	5.87164	32.5275	1.17517e-08	6.71465e-07
Lmo2	NM_001142335	-0.466736	9.39641	32.3276	1.30249e-08	7.40815e-07
Chl1	NM_007697	-2.61479	0.125102	32.2902	1.32784e-08	7.49575e-07
Rgs7bp	NM_029879	-1.41125	3.09196	32.2871	1.32993e-08	7.49575e-07
Ramp1	NM_001168392	-0.586751	6.90431	32.2683	1.34287e-08	7.50798e-07
Ralgps2	NM_001159965	-0.59716	5.84862	31.9598	1.57395e-08	8.71339e-07
Entpd5	NM_001026214	-0.519098	6.98945	31.6861	1.81218e-08	9.98784e-07
Kcna2	NM_008417	-3.85902	-0.410862	31.5662	1.92759e-08	1.05771e-06
Smoc1	NM_001146217	-2.03378	2.16894	31.4771	2.0181e-08	1.10252e-06
Bcl2l1	NM_001289716	-0.829097	4.33757	31.1972	2.33099e-08	1.25944e-06
Ap1s2	NM_001290378	-0.659162	4.41011	31.0975	2.4539e-08	1.31749e-06
A830080D01Rik	NM_001033472	-0.571375	5.85583	31.0445	2.52176e-08	1.34811e-06
Lgmn	NM_011175	-1.60374	2.0434	30.6423	3.10249e-08	1.64445e-06
Camkk2	NM_001199676	-0.479004	6.71046	30.0661	4.1757e-08	2.17626e-06
Ift81	NM_009879	-0.793447	4.05107	29.9931	4.33591e-08	2.25034e-06
Lrrn4	NM_177303	-0.87499	3.90068	29.3767	5.95903e-08	3.06718e-06
Cdc42se2	NM_178626	-0.408869	7.27564	29.27	6.2964e-08	3.22449e-06
Rag1	NM_009019	-2.64326	0.50586	29.2638	6.31643e-08	3.22449e-06
Def8	NM_001253783	-0.499839	7.99444	29.1152	6.82009e-08	3.45329e-06
Ebi3	NM_015766	-0.881617	3.98337	28.9464	7.44089e-08	3.73725e-06
Tmem158	NM_001002267	-1.0802	3.17814	28.9271	7.51553e-08	3.74454e-06
Asph	NM_001177849	-0.545154	5.61955	28.8395	7.86321e-08	3.88667e-06
Tmem121	NM_153776	-1.27256	2.37258	28.8123	7.97448e-08	3.92609e-06
Ldhb	NM_001302765	-0.719463	5.58005	28.7499	8.23553e-08	4.0071e-06
Sort1	NM_001271599	-0.393651	7.32192	28.688	8.5029e-08	4.10512e-06
Nfic	NM_008688	-0.426376	8.04959	27.9095	1.27127e-07	5.99808e-06
Nefh	NM_010904	-0.643027	5.17349	27.8672	1.29934e-07	6.1074e-06
Mecom	NM_007963	-0.657275	6.33972	27.7975	1.347e-07	6.30759e-06
Ctsh	NM_001312649	-1.37542	2.87508	27.3991	1.65509e-07	7.69249e-06
Pou2f2	NM_001163554	-0.589511	5.0654	27.2015	1.83313e-07	8.42562e-06
Lhfpl2	NM_172589	-0.704384	4.36694	27.1189	1.91316e-07	8.7018e-06
Hdac9	NM_001271386	-0.903232	4.33509	27.1109	1.92116e-07	8.7018e-06
Prdx4	NM_001313711	-0.561073	5.26048	27.0966	1.93541e-07	8.73458e-06
Ifngr2	NM_008338	-0.710398	4.52388	27.0581	1.97431e-07	8.87796e-06
Mllt3	NM_001286158	-0.505471	6.10928	26.982	2.05362e-07	9.16767e-06
Slc7a2	NM_001044740	-2.00232	0.680858	26.9752	2.06081e-07	9.16767e-06
Il12rb2	NM_001311141	-0.702449	4.1783	26.8613	2.18588e-07	9.68943e-06
Siglecg	NM_172900	-0.987983	3.23839	26.7451	2.32137e-07	1.02536e-05
Ptgs1	NM_008969	-0.540166	5.9036	26.7328	2.33617e-07	1.02824e-05
Gcat	NM_001161712	-1.09193	3.18219	26.7169	2.35557e-07	1.03313e-05
Serpini1	NM_009250	-0.89057	4.15019	26.6892	2.38949e-07	1.04433e-05
Coro2b	NM_175484	-1.04492	3.32254	26.3905	2.78903e-07	1.20625e-05
Mertk	NM_008587	-2.45053	-0.11642	26.215	3.0544e-07	1.31646e-05
Capg	NM_001042534	-0.474129	6.13223	26.1109	3.2236e-07	1.38459e-05
Cpne2	NM_153507	-0.406521	7.01559	26.0619	3.30649e-07	1.4132e-05
Arhgap29	NM_172525	-0.790336	3.87803	26.0581	3.3129e-07	1.4132e-05
Adap1	NM_172723	-0.564988	5.38098	26.0134	3.39061e-07	1.44141e-05
Rnf24	NM_178607	-0.795887	4.71697	25.9602	3.48525e-07	1.47661e-05
Cyp27a1	NM_024264	-1.78434	1.77071	25.9484	3.50675e-07	1.48068e-05
Tex15	NM_031374	-1.92193	0.771201	25.5676	4.27143e-07	1.7854e-05
Lst1	NM_010734	-1.12787	3.21024	25.3913	4.68022e-07	1.94973e-05
Svep1	NM_022814	-2.28482	-0.145656	25.1639	5.26592e-07	2.18641e-05
Col14a1	NM_181277	-2.95767	0.646728	24.9015	6.03352e-07	2.48031e-05
Maoa	NM_173740	-0.681566	4.1155	24.6421	6.90262e-07	2.81898e-05
Cd9	NM_007657	-0.538149	5.495	24.3899	7.86815e-07	3.15131e-05
Oosp1	NM_133353	-2.72415	-0.369302	24.0373	9.44871e-07	3.73629e-05
Itsn1	NM_001110275	-0.582229	6.81675	23.878	1.02641e-06	4.0331e-05
Slc2a3	NM_011401	-0.429341	7.06568	23.7903	1.07423e-06	4.20773e-05
Abcb1b	NM_011075	-0.487598	5.87487	23.7693	1.08599e-06	4.24046e-05
Fam129b	NM_146119	-0.485483	5.40342	23.6752	1.14045e-06	4.42539e-05
Wfdc2	NM_026323	-2.11629	0.602764	23.6434	1.15941e-06	4.47739e-05
Gnpda1	NM_011937	-0.588989	4.36241	23.5606	1.21042e-06	4.62484e-05
Nrarp	NM_025980	-0.916551	3.08015	23.5505	1.21679e-06	4.63496e-05
Jchain	NM_152839	-1.76238	7.01456	23.5356	1.22627e-06	4.65682e-05
Bok	NM_016778	-1.45524	1.55877	23.4711	1.26804e-06	4.78144e-05
Jam2	NM_023844	-1.31057	2.29199	23.4672	1.2706e-06	4.78144e-05
Col1a2	NM_007743	-1.25022	2.09678	23.3935	1.32026e-06	4.95337e-05
Slc16a12	NM_172838	-0.710362	4.15782	23.3312	1.36367e-06	5.10086e-05
Rgag4	NM_001278534	-0.581805	5.06758	23.0978	1.53966e-06	5.71294e-05
Ryk	NM_001042607	-0.799593	3.6576	23.0961	1.54106e-06	5.71294e-05
Plxna3	NM_008883	-0.749566	4.54032	23.0846	1.55026e-06	5.72997e-05
Frmd4b	NM_145148	-0.665194	4.46398	23.046	1.58172e-06	5.82895e-05
Blnk	NM_008528	-1.6602	1.55724	22.9579	1.65585e-06	6.08417e-05
Phlda2	NM_009434	-1.71164	1.0337	22.8957	1.71036e-06	6.26594e-05
Kif23	NM_024245	-0.439889	6.97502	22.8758	1.72817e-06	6.31264e-05
Ppp1r3b	NM_177741	-0.715896	4.17842	22.8583	1.74395e-06	6.35166e-05
Rhobtb3	NM_028493	-0.506018	6.3272	22.8239	1.77545e-06	6.44751e-05
Ccr3	NM_009914	-3.85383	0.719626	22.8082	1.79004e-06	6.47838e-05
Klhl13	NM_001290476	-1.83714	0.321355	22.8035	1.79435e-06	6.47838e-05
Plcb2	NM_001290790	-0.42478	8.24921	22.786	1.81076e-06	6.51872e-05
Camsap2	NM_001081360	-0.817898	3.42455	22.6555	1.93806e-06	6.93693e-05
Camsap3	NM_001163749	-0.748519	4.21349	22.5706	2.02565e-06	7.19937e-05
Slc11a1	NM_013612	-3.3549	-0.555201	22.4979	2.10374e-06	7.38146e-05
Fam134b	NM_001034851	-0.481066	6.78689	22.2488	2.39511e-06	8.28709e-05
Mfhas1	NM_001081279	-0.780414	3.69938	22.1682	2.4978e-06	8.61844e-05
Prkcb	NM_001316672	-0.738116	3.8518	22.1246	2.55514e-06	8.79193e-05
Rab32	NM_026405	-0.493152	5.50791	22.0321	2.68122e-06	9.17508e-05
Cdk14	NM_001310448	-0.723044	4.20173	21.7779	3.06111e-06	0.000103612
Tnfrsf18	NM_009400	-0.736501	3.5826	21.5776	3.39794e-06	0.000114701
Rap2a	NM_029519	-0.659191	4.68452	21.537	3.47062e-06	0.000116523
Spata13	NM_001033272	-0.426642	6.13058	21.2524	4.02611e-06	0.000134448
Eps8l1	NM_001290416	-1.27494	4.45971	21.244	4.04377e-06	0.000134677
5730409E04Rik	NM_001013755	-0.731008	3.61706	21.2226	4.08904e-06	0.000135822
B3galnt1	NM_020026	-2.20965	-0.237027	21.0709	4.42588e-06	0.000146619
Pcgf5	NM_029508	-0.393703	6.16464	20.9247	4.77687e-06	0.000157827
Ppargc1a	NM_008904	-1.26322	1.94676	20.8479	4.97233e-06	0.000162988
Pkia	NM_008862	-0.749515	3.7168	20.836	5.00338e-06	0.000163575
Magi3	NM_001159354	-0.646917	3.84292	20.8262	5.02911e-06	0.000163986
Epha7	NM_001122889	-1.60871	2.91997	20.7976	5.1046e-06	0.000166013
Tle2	NM_001252401	-0.611482	5.13571	20.7531	5.22479e-06	0.000169039
Itgad	NM_001029872	-2.45828	0.87638	20.5454	5.82343e-06	0.000187433
Snx30	NM_172468	-0.373052	6.93836	20.4445	6.13871e-06	0.000196565
Limd2	NM_172397	-0.474326	7.49803	20.4349	6.16933e-06	0.000197039
Fsd1l	NM_001195284	-0.564346	4.63419	20.2867	6.66616e-06	0.000211821
Cd81	NM_133655	-0.338379	6.94977	20.2696	6.72595e-06	0.000213177
Nek6	NM_001159631	-0.558087	4.62124	20.1984	6.98113e-06	0.000220144
Tnfrsf13c	NM_028075	-0.92056	2.95528	20.1687	7.0903e-06	0.000223022
Cd2ap	NM_009847	-0.423731	5.97974	20.0494	7.54658e-06	0.00023623
Enpp1	NM_001308327	-1.05707	3.18534	20.049	7.54814e-06	0.00023623
Icosl	NM_015790	-0.853064	3.43839	19.9966	7.75819e-06	0.000240388
Reck	NM_016678	-0.857654	3.35134	19.944	7.97424e-06	0.000245252
Gimap8	NM_001077410	-0.550577	5.55512	19.9081	8.12533e-06	0.000249284
Dnmt3b	NM_001003960	-0.416132	7.00591	19.8943	8.18421e-06	0.000250473
Fam46a	NM_001160378	-1.02609	4.93578	19.7783	8.69633e-06	0.000264845
Tmem65	NM_175212	-0.614289	4.77868	19.7693	8.73746e-06	0.000265448
Fbp1	NM_019395	-0.866643	3.11336	19.7002	9.05905e-06	0.000273882
Rap1gds1	NM_001040690	-0.376726	6.71372	19.6356	9.37056e-06	0.000282614
Lsp1	NM_001136071	-0.431043	6.90148	19.5606	9.74575e-06	0.00029322
Lrrn3	NM_001271708	-1.77833	0.757846	19.4028	1.05853e-05	0.000317713
Lmbr1	NM_020295	-0.723686	3.55253	19.387	1.06729e-05	0.000319572
Grb10	NM_001177629	-0.484956	5.61841	19.3243	1.10291e-05	0.000329444
Lonrf3	NM_028894	-0.767517	5.47318	19.2374	1.1543e-05	0.00034315
Cxcl12	NM_001012477	-3.25305	0.347374	19.1958	1.17974e-05	0.000349876
Rnf144b	NM_001170643	-0.648192	4.16985	19.0983	1.24152e-05	0.000367326
Clec14a	NM_025809	-2.2886	-0.101363	19.0414	1.27911e-05	0.000376657
Svip	NM_001160345	-0.467435	5.09605	18.9503	1.34171e-05	0.000393232
Obsl1	NM_001310679	-0.592222	4.68339	18.8972	1.37952e-05	0.000402566
Eps8	NM_001271587	-0.527454	4.77273	18.8965	1.38002e-05	0.000402566
Lincred1	NR_131913	-0.601337	4.97693	18.7097	1.52203e-05	0.000440894
Stk26	NM_001313744	-0.333724	7.48975	18.68	1.54598e-05	0.000445756
Als2	NM_001159948	-0.416061	6.21338	18.6149	1.59964e-05	0.000460165
Ptk7	NM_175168	-0.520123	5.28271	18.5857	1.62436e-05	0.00046406
Map3k9	NM_001174107	-0.948287	3.23305	18.5647	1.64237e-05	0.000468132
Itga6	NM_001277970	-0.351747	7.50705	18.4759	1.72069e-05	0.000488221
Crispld1	NM_031402	-0.473068	5.39854	18.4442	1.74953e-05	0.000495275
Ptprf	NM_011213	-1.06179	2.27742	18.3853	1.80443e-05	0.000509661
Smarca1	NM_001290708	-1.678	0.547925	18.1725	2.01771e-05	0.000567326
Car13	NM_024495	-0.622548	3.67821	18.1213	2.07269e-05	0.000580166
Tgfbi	NM_009369	-0.616222	4.24293	18.0117	2.19556e-05	0.00061181
B4galnt4	NM_177897	-0.675743	3.99621	18.0028	2.20577e-05	0.000611917
Exph5	NM_176846	-1.94304	0.446145	17.9873	2.22387e-05	0.000615567
Kcng1	NM_001081134	-1.4111	1.67521	17.963	2.25239e-05	0.000620702
Plxnc1	NM_018797	-0.36478	7.73699	17.9271	2.29528e-05	0.000629735
Stard13	NM_001163493	-1.94551	0.836999	17.8984	2.33013e-05	0.000637892
Prkcq	NM_008859	-0.485628	5.75092	17.8885	2.34235e-05	0.000639831
Haao	NM_025325	-0.636176	3.84341	17.8695	2.36581e-05	0.00064375
Fam167a	NM_177628	-0.630756	4.07244	17.8685	2.36703e-05	0.00064375
Kcns1	NM_008435	-1.62287	0.949441	17.8424	2.39971e-05	0.0006498
Lyz2	NM_017372	-0.317161	7.15314	17.8122	2.43811e-05	0.000658767
Lancl3	NM_173414	-1.37927	1.28245	17.7663	2.49774e-05	0.000671963
Ctss	NM_001267695	-0.866374	4.70266	17.7174	2.56278e-05	0.000687974
Pam	NM_013626	-0.411979	5.88267	17.6938	2.59477e-05	0.000693573
Fcgr2b	NM_001077189	-0.85178	3.25161	17.6529	2.6511e-05	0.000705599
P2ry13	NM_028808	-1.92008	0.332958	17.5604	2.78326e-05	0.000737624
Eepd1	NM_026189	-0.654091	3.73117	17.5508	2.79727e-05	0.000739763
Slc35b4	NM_021435	-0.368592	6.51797	17.5447	2.80629e-05	0.000740574
Slc4a1	NM_011403	-3.42854	0.614633	17.5311	2.82651e-05	0.000744333
Il6st	NM_010560	-0.406586	5.81733	17.5127	2.85394e-05	0.000749971
Lzts1	NM_199364	-2.06548	-0.105553	17.4889	2.88994e-05	0.000757834
Mzb1	NM_027222	-2.20435	1.23166	17.4632	2.92928e-05	0.000766537
Shroom3	NM_001077595	-1.7413	0.981604	17.4155	3.00368e-05	0.000782717
Mcu	NM_001033259	-0.671592	4.10602	17.3953	3.03574e-05	0.000788247
Cbx6	NM_028763	-0.339332	7.31316	17.3942	3.03756e-05	0.000788247
Rab31	NM_133685	-0.312981	7.03185	17.3504	3.10837e-05	0.000803274
Ptpn21	NM_001146199	-0.447857	5.1685	17.2348	3.30324e-05	0.000850106
D5Ertd605e	NR_033625	-0.961695	2.45223	17.2277	3.31559e-05	0.000850284
Irak3	NM_028679	-0.501489	5.31699	17.2226	3.32458e-05	0.000850328
B4galt4	NM_001285793	-0.561733	4.6125	17.1755	3.40812e-05	0.000869909
Eef2k	NM_001267710	-0.324953	8.22497	17.0672	3.60803e-05	0.000919052
Pik3c2a	NM_011083	-0.46093	5.26451	17.019	3.70071e-05	0.000940735
Ankrd33b	NM_001164441	-0.705338	3.41795	17.0077	3.72287e-05	0.00094444
Mansc1	NM_026345	-0.550779	4.14388	16.9696	3.79834e-05	0.000959677
Fam49a	NM_001146119	-0.435344	5.67254	16.8832	3.97524e-05	0.00100032
2018-09-10	NM_001024910	-1.63837	0.314521	16.8328	4.08225e-05	0.00102517
Cdkn1c	NM_001161624	-0.921701	3.12429	16.8002	4.15286e-05	0.00103872
Extl3	NM_018788	-0.365468	6.60549	16.7949	4.16458e-05	0.00103956
Pld2	NM_001302475	-0.747484	3.45748	16.7718	4.21546e-05	0.00105015
Gucy1a3	NM_021896	-0.449705	4.74118	16.7652	4.23011e-05	0.0010517
Itpripl1	NM_001163527	-0.470641	4.67952	16.6889	4.40368e-05	0.0010905
Kcnj10	NM_001039484	-2.61627	0.452071	16.6177	4.57218e-05	0.00112998
Xkr5	NM_001113350	-0.527401	4.26754	16.5837	4.65504e-05	0.00114591
Timp2	NM_011594	-0.512125	5.35627	16.5313	4.78542e-05	0.00117568
Slc29a3	NM_023596	-0.404724	6.12984	16.4482	4.99988e-05	0.00122355
Galnt10	NM_134189	-0.389995	5.54865	16.4268	5.05664e-05	0.00123156
Socs2	NM_001168655	-0.870689	2.9398	16.4214	5.07091e-05	0.00123156
Gcnt1	NM_001136484	-0.384904	6.04851	16.4209	5.07218e-05	0.00123156
Tek	NM_001290549	-0.45469	5.09947	16.4032	5.11994e-05	0.00124074
Neurl1b	NM_001081656	-0.627499	4.09312	16.3801	5.18279e-05	0.00124868
Adamtsl5	NM_001113548	-0.991506	2.19322	16.2663	5.50329e-05	0.00132079
Foxred2	NM_001017983	-0.343839	6.47398	16.2482	5.55626e-05	0.00133094
Bace1	NM_001145947	-0.431887	5.87999	16.2187	5.64342e-05	0.00134922
Pkib	NM_001039050	-0.891353	2.53584	16.1791	5.76262e-05	0.00137245
Ppfibp2	NM_001163557	-0.489436	4.50202	16.1358	5.89574e-05	0.00140148
Gm11837	NM_001243100	-1.71181	0.613415	16.0901	6.03977e-05	0.00143025
Fam20c	NM_030565	-1.44119	0.691674	16.0863	6.05193e-05	0.00143042
Zfp862-ps	NR_015597	-0.653963	3.72765	16.0316	6.22949e-05	0.00146405
Msi2	NM_001201341	-0.357434	8.65878	15.9692	6.43826e-05	0.00150742
Clcn3	NM_007711	-0.417774	6.11508	15.9146	6.62665e-05	0.00154283
Pdk3	NM_145630	-0.343334	6.27764	15.872	6.77748e-05	0.00157501
Vldlr	NM_001161420	-0.665468	7.12852	15.8379	6.90068e-05	0.00160065
Lrba	NM_001077687	-0.337363	6.84646	15.7223	7.33555e-05	0.00169521
Mn1	NM_001081235	-0.620614	4.40434	15.7014	7.41708e-05	0.00171087
Brca2	NM_001081001	-0.333147	6.89218	15.696	7.43811e-05	0.00171255
Evi5	NM_007964	-0.513838	4.6368	15.648	7.62932e-05	0.00174689
1500009L16Rik	NM_001145198	-0.805248	3.08919	15.4276	8.57278e-05	0.00194504
Cpxm1	NM_019696	-0.687558	3.69098	15.3382	8.98807e-05	0.00202451
Neo1	NM_001042752	-1.33306	1.57141	15.2829	9.25499e-05	0.00207712
Fmnl2	NM_172409	-0.500294	6.23507	15.2682	9.3272e-05	0.00208956
Entpd1	NM_001304721	-0.539303	4.60081	15.0901	0.000102501	0.0022799
Gipc3	NM_148951	-1.79554	0.93851	15.0411	0.000105193	0.00233562
Bex1	NM_009052	-0.774363	3.28522	15.0308	0.000105771	0.00234427
Dpy19l3	NM_178704	-0.344641	6.44678	14.9922	0.000107959	0.00238429
Ak4	NM_001177602	-0.502745	5.25551	14.9687	0.000109312	0.00240472
Hip1	NM_146001	-0.430622	5.36538	14.9305	0.000111543	0.00244609
Gpc3	NM_016697	-1.22421	1.68548	14.9033	0.000113165	0.0024643
Rnf157	NM_027258	-0.503248	4.43882	14.8939	0.000113732	0.00247234
1700001O22Rik	NM_198000	-1.37273	0.789569	14.8758	0.000114825	0.00249175
BC016579	NM_145389	-0.831615	3.08863	14.8636	0.000115574	0.00250363
Dennd4a	NM_001162917	-0.318739	6.50495	14.7872	0.000120348	0.00259352
Igdcc4	NM_001290315	-0.958614	2.87813	14.7769	0.000121006	0.0026032
Trpv2	NM_011706	-0.407585	5.70462	14.7449	0.00012308	0.00264325
Celsr1	NM_009886	-0.489717	5.47963	14.7016	0.000125937	0.00269996
Tcf7l1	NM_001079822	-1.35684	1.37259	14.6934	0.00012649	0.00270715
Nav1	NM_173437	-0.330198	6.5821	14.6163	0.000131772	0.00281323
Gatm	NM_025961	-0.377049	5.91405	14.5799	0.000134343	0.00285558
Skint3	NM_001102474	-1.69489	-0.134836	14.57	0.00013505	0.00286572
Ocln	NM_008756	-1.80222	0.25001	14.5335	0.00013769	0.00291024
Adgrd1	NM_001081342	-0.633268	3.73364	14.4584	0.000143288	0.00300976
Tmcc1	NM_177412	-0.496043	4.16235	14.445	0.000144314	0.00302114
Dok1	NM_001291799	-0.43233	4.86804	14.4183	0.000146376	0.00304962
Trp53i11	NM_001025246	-0.385595	5.92847	14.4178	0.000146409	0.00304962
Itgb5	NM_001145884	-0.547776	4.55058	14.3828	0.000149157	0.00309387
Klhl23	NM_177784	-0.420529	5.53794	14.3799	0.000149389	0.00309387
Ggta1	NM_001145821	-0.37676	6.31184	14.3782	0.000149527	0.00309387
Fzd9	NM_010246	-1.30287	1.19774	14.3554	0.000151348	0.00312635
P2rx1	NM_008771	-0.410481	5.20332	14.3416	0.000152461	0.00314413
Rgs11	NM_001081069	-1.17539	1.43838	14.3365	0.000152873	0.00314741
Syngr1	NM_009303	-1.12789	1.58666	14.3304	0.000153365	0.00315234
Hoxa10	NM_001122950	-0.525466	4.36774	14.3113	0.000154934	0.00317934
Adgre4	NM_139138	-2.13747	0.166756	14.2408	0.000160843	0.00327899
Zfp239	NM_001001792	-0.644056	3.59287	14.1496	0.000168836	0.0034307
AA467197	NM_001004174	-1.69214	0.0457577	14.1015	0.000173202	0.00350797
Mllt4	NM_010806	-0.412204	5.98556	14.0922	0.000174068	0.0035198
Sall2	NM_001244916	-0.423778	4.84099	14.0504	0.000177973	0.00358131
Tpst1	NM_001130476	-0.486688	4.04734	14.0323	0.000179694	0.0036043
Fbxo10	NM_001024142	-0.591343	3.57575	13.9541	0.000187324	0.00373928
Eno2	NM_001302642	-1.27468	0.742864	13.9441	0.000188333	0.00375339
Morn4	NM_198108	-0.778403	2.79008	13.8746	0.000195423	0.00388228
Mier3	NM_172593	-0.358313	5.99705	13.8492	0.000198085	0.00392578
Nxf7	NM_130888	-2.03822	-0.345397	13.8477	0.000198243	0.00392578
Man1a	NM_008548	-0.321852	7.3796	13.8146	0.000201765	0.00397737
Fkbp9	NM_012056	-0.395335	5.851	13.7496	0.00020887	0.0041036
Pparg	NM_001127330	-2.21424	-0.532986	13.6025	0.000225884	0.00440316
Slc48a1	NM_026353	-0.344722	6.81805	13.5793	0.000228696	0.00443713
Rapgef3	NM_001177810	-0.86511	2.64696	13.5647	0.000230474	0.00445774
Efnb1	NM_010110	-0.606835	3.69462	13.4866	0.00024027	0.00463282
Glrx	NM_053108	-0.502328	4.99163	13.4741	0.000241885	0.00465676
Cyp26b1	NM_001177713	-1.28532	1.73673	13.4456	0.000245579	0.00471945
C1ra	NM_023143	-0.687317	3.8233	13.3851	0.000253632	0.0048466
4930539E08Rik	NM_172450	-0.721338	3.04842	13.3847	0.000253691	0.0048466
Stau2	NM_001111272	-0.480471	4.2957	13.3609	0.000256921	0.00490078
Ccdc112	NM_001160399	-0.451874	4.40608	13.352	0.000258153	0.00491674
Bex4	NM_212457	-0.770087	2.89468	13.2299	0.00027552	0.0052077
Tfcp2l1	NM_023755	-1.1324	1.76491	13.1817	0.000282701	0.0053074
Emb	NM_010330	-0.424166	8.23113	13.1802	0.000282925	0.0053074
Marveld1	NM_183195	-0.357929	5.80756	13.1422	0.000288726	0.00539185
Tmbim1	NM_027154	-0.356646	5.64949	13.1199	0.000292179	0.00544817
Ttc39b	NM_025782	-0.459019	5.40791	13.1121	0.000293401	0.00546278
Slc6a15	NM_001252330	-0.511906	4.31361	13.1028	0.000294857	0.00548171
B3gnt7	NM_145222	-0.875468	2.43817	13.0947	0.000296138	0.0054973
Pnck	NM_001199351	-0.674567	3.56684	12.9885	0.000313411	0.00575788
Ccr7	NM_001301713	-1.45264	0.702856	12.9777	0.000315227	0.00578272
Slc12a2	NM_009194	-0.334274	5.92881	12.9673	0.000316985	0.00580641
Aph1b	NM_177583	-0.71206	3.21608	12.8494	0.000337579	0.0061565
Vasn	NM_139307	-0.510278	4.9124	12.801	0.000346429	0.00628111
Med12l	NM_177855	-0.345225	5.91344	12.7577	0.000354547	0.00640964
Ugt1a7c	NM_201642	-0.44805	4.50014	12.7097	0.00036376	0.00655904
Endou	NM_001168693	-1.19988	1.03843	12.6821	0.000369167	0.006645
Lfng	NM_008494	-0.436942	5.17573	12.6208	0.000381474	0.00684674
Syt9	NM_021889	-1.70109	0.103283	12.6069	0.000384334	0.00688816
Prr5l	NM_001083810	-1.05049	1.56105	12.6042	0.000384891	0.00688822
Rnf13	NM_001113413	-0.317099	6.54436	12.5776	0.0003904	0.00697679
Echdc2	NM_001254754	-1.46954	0.201531	12.4917	0.000408762	0.00726325
Pik3cb	NM_029094	-0.462452	4.0985	12.3473	0.000441615	0.00782468
Traf5	NM_011633	-0.694408	2.98769	12.3207	0.000447958	0.00791455
Armcx2	NM_001166397	-0.333566	6.02669	12.3018	0.000452516	0.00797248
Abca5	NM_147219	-0.716196	3.12449	12.2928	0.0004547	0.00799963
App	NM_001198823	-0.46014	5.40844	12.2839	0.000456876	0.00802658
Sh3bp4	NM_133816	-1.20952	1.20325	12.0222	0.000525717	0.00912024
Cd68	NM_001291058	-0.618783	3.70817	11.9827	0.000536958	0.0092765
Sh3bp5	NM_011894	-0.40734	4.81472	11.9534	0.000545477	0.00938714
Cln6	NM_001033175	-0.319176	6.41682	11.9165	0.000556379	0.00954581
Sh3pxd2b	NM_177364	-0.424244	4.26831	11.812	0.000588514	0.0100216
Lrrc66	NM_153568	-1.01179	1.64152	11.7801	0.000598684	0.0101597
Elovl7	NM_029001	-0.635388	3.24036	11.7744	0.000600503	0.0101767
Evc2	NM_145920	-1.05553	1.81409	11.7365	0.000612848	0.010357
Frmd6	NM_028127	-0.344615	6.05502	11.7342	0.000613636	0.010357
Bpifb5	NM_144890	-1.19834	1.58004	11.7269	0.000616019	0.0103831
Ankrd50	NM_001033198	-0.460133	4.22004	11.6445	0.000643926	0.0108242
Stap1	NM_001310639	-0.325034	6.00294	11.6186	0.000652967	0.0109614
Arhgap32	NM_001195632	-0.250675	7.86434	11.6133	0.000654803	0.0109774
Trpm2	NM_138301	-1.01082	2.65108	11.6088	0.000656422	0.0109898
Gnptab	NM_001004164	-0.252418	7.87734	11.5966	0.000660734	0.0110471
Pls1	NM_001033210	-1.49613	0.334857	11.5694	0.000670447	0.0111477
Wfdc18	NM_007969	-1.55158	-0.00550675	11.5677	0.00067107	0.0111477
6430548M08Rik	NM_001163760	-1.1959	0.739097	11.5673	0.000671224	0.0111477
Pxylp1	NM_001289645	-0.343344	5.40946	11.5584	0.000674453	0.0111864
Fam135a	NM_026604	-0.728406	3.13152	11.5528	0.000676463	0.0112048
Ttc8	NM_029553	-0.47696	4.11433	11.5028	0.000694896	0.0114644
Cryz	NM_009968	-0.487208	3.85419	11.4801	0.000703471	0.0115905
Sbf2	NM_177324	-0.848498	2.67613	11.4615	0.000710531	0.011676
Rbfox2	NM_001110827	-0.470369	4.15395	11.4199	0.000726634	0.0119092
Aph1c	NM_026674	-0.555612	3.82291	11.383	0.000741184	0.0120999
1700025G04Rik	NM_197990	-0.383128	6.08249	11.3721	0.000745572	0.0121556
Gramd3	NM_026240	-0.544676	3.81688	11.3367	0.000759894	0.0123567
Kcnd3	NM_001039347	-1.32961	1.444	11.2996	0.000775239	0.0125734
Pvrl2	NM_001159724	-1.01952	1.59702	11.2902	0.000779187	0.0126035
Gda	NM_010266	-0.501473	4.16028	11.2891	0.00077964	0.0126035
Rps6ka6	NM_025949	-0.732753	2.82892	11.2879	0.000780128	0.0126035
Abat	NM_001170978	-1.30228	0.420199	11.269	0.000788142	0.0127
Tnfaip1	NM_001159392	-0.511742	3.99577	11.2644	0.000790097	0.0127151
Tmem109	NM_134142	-0.384802	4.61707	11.2564	0.000793508	0.012737
Dcaf12l1	NM_001190718	-0.526813	3.54567	11.1946	0.000820335	0.0131507
Ergic1	NM_026170	-0.273571	6.93538	11.1625	0.000834669	0.0133461
Pnp2	NM_001123371	-1.25308	0.923738	11.1206	0.000853742	0.0135987
Snx24	NM_029394	-0.806969	2.48996	11.0991	0.000863688	0.0137396
Lmcd1	NM_144799	-1.51684	-0.37787	11.0757	0.000874643	0.0138961
Etv1	NM_001163154	-1.47601	0.96892	11.0299	0.000896539	0.0142077
Zc3h12d	NM_172785	-1.02069	1.98282	10.9856	0.000918234	0.0145146
Irf4	NM_013674	-1.43417	2.39639	10.9748	0.000923606	0.014581
Pglyrp2	NM_001271476	-0.337788	6.96105	10.9717	0.000925143	0.0145868
Ldhd	NM_027570	-0.791777	3.15546	10.9597	0.000931128	0.0146441
Gapt	NM_177713	-1.09107	1.41088	10.9484	0.000936865	0.0147158
Rgs19	NM_001291205	-0.269225	6.48649	10.9368	0.000942716	0.014789
Aim2	NM_001013779	-0.332537	6.07589	10.9237	0.000949419	0.0148567
Net1	NM_001047159	-0.342456	6.24601	10.9096	0.000956664	0.014935
Syt11	NM_018804	-0.475568	3.92712	10.9093	0.000956819	0.014935
Fxyd1	NM_019503	-1.42612	-0.148017	10.9039	0.000959642	0.0149603
Lrp1	NM_008512	-0.561705	3.83108	10.8903	0.000966666	0.015051
Ggh	NM_010281	-0.388312	4.56815	10.877	0.000973666	0.0151411
Gucd1	NM_175133	-0.354931	4.868	10.773	0.00102993	0.015976
Apobr	NM_138310	-0.4109	5.42144	10.7633	0.00103535	0.0160326
Rora	NM_001289916	-0.469377	4.63849	10.7618	0.00103615	0.0160326
Kdelc2	NM_212445	-0.366501	4.69491	10.7531	0.00104103	0.0160683
Slc39a11	NM_001166503	-0.287271	6.22329	10.7287	0.00105488	0.0162379
Lsr	NM_001164184	-0.914982	1.97975	10.7268	0.00105593	0.0162379
Syngap1	NM_001281491	-0.439602	4.95976	10.7096	0.0010658	0.0163493
Nrm	NM_134122	-0.305483	6.17	10.6862	0.00107937	0.0165371
Cntrob	NM_172560	-0.338958	5.45924	10.6749	0.00108601	0.0166183
2510009E07Rik	NM_001001881	-0.78659	2.65461	10.6716	0.00108791	0.016627
Fjx1	NM_010218	-1.46293	-0.300002	10.6628	0.00109312	0.0166861
Socs5	NM_019654	-0.334872	6.13124	10.6505	0.00110041	0.0167768
Il18r1	NM_001161842	-0.441142	4.40594	10.6247	0.00111585	0.0169902
Ccdc88a	NM_176841	-0.31117	6.69582	10.6096	0.00112504	0.0170896
Rbm47	NM_001127382	-0.784314	2.54319	10.5936	0.00113482	0.0172172
Mageh1	NM_023788	-0.662487	2.88112	10.5715	0.00114843	0.0173714
Comt	NM_001111062	-0.286893	5.95165	10.5703	0.00114916	0.0173714
Homer2	NM_001164086	-1.38217	0.457989	10.5075	0.00118889	0.0179067
Jam3	NM_023277	-0.815502	2.61074	10.4795	0.00120708	0.0181149
Ankrd63	NM_001081971	-1.45211	0.949344	10.4699	0.00121338	0.0181875
Dcaf6	NM_028759	-0.378926	5.0205	10.4651	0.00121648	0.0182121
Mira	NR_045199	-0.465707	4.20303	10.4413	0.00123226	0.0184262
Arhgef11	NM_001003912	-0.381188	5.12212	10.4205	0.00124625	0.0185907
2610305D13Rik	NM_145078	-0.631395	3.74413	10.4055	0.00125641	0.0186897
Fgd2	NM_001159538	-0.350931	5.66625	10.3942	0.00126409	0.018767
Ankrd6	NM_001012450	-0.665624	2.86179	10.3898	0.00126714	0.0187899
Adamts17	NM_001033877	-1.13842	0.688663	10.3658	0.00128371	0.019013
Cxcr4	NM_009911	-0.431913	6.10662	10.3504	0.00129446	0.019104
Syne1	NM_001079686	-0.308578	6.12955	10.3219	0.00131461	0.0193327
Loxl3	NM_013586	-0.844236	2.16488	10.2962	0.00133302	0.0195342
Tmem43	NM_028766	-0.284219	6.33088	10.2886	0.00133851	0.0195917
Tbc1d9	NM_001111304	-0.446526	4.66409	10.2476	0.00136859	0.0198841
Fam171a2	NM_199200	-0.44837	3.92993	10.2279	0.0013833	0.0200587
Slc29a1	NM_001199113	-0.264948	6.50759	10.2077	0.00139855	0.0202326
Myo1d	NM_177390	-0.657974	3.50143	10.2046	0.00140092	0.0202358
Phldb2	NM_001252442	-0.538125	3.67112	10.2031	0.00140201	0.0202358
Angptl2	NM_011923	-0.852723	2.54458	10.1939	0.00140907	0.0203116
Kif5a	NM_001039000	-0.88887	2.27514	10.192	0.00141052	0.0203116
Cdc42bpa	NM_001033285	-0.300868	5.93779	10.1494	0.00144351	0.0206434
Alas2	NM_001102446	-1.49613	0.412738	10.1015	0.00148147	0.0210893
Pou2af1	NM_011136	-1.59275	2.2485	10.0957	0.00148613	0.0211316
Lasp1	NM_010688	-0.257281	7.49674	10.0815	0.00149767	0.0212607
Slc26a11	NM_178743	-0.458792	4.61336	10.0803	0.00149863	0.0212607
Ect2	NM_001177625	-0.298736	6.64424	10.0744	0.0015034	0.0213042
Smagp	NM_001033872	-0.99286	1.17096	10.0592	0.00151587	0.0214565
Palld	NM_001081390	-0.590793	3.51139	10.0389	0.0015327	0.0216455
Camk2d	NM_001025438	-0.327452	5.58087	10.0338	0.00153691	0.0216558
Gja1	NM_010288	-0.868023	3.35547	10.014	0.00155355	0.0218468
Ccser1	NM_001164316	-0.844931	2.71195	9.99507	0.0015696	0.0220169
Gm8909	NM_001081032	-1.43741	-0.395524	9.95842	0.00160115	0.022409
Sigmar1	NM_001286538	-0.322212	5.1839	9.94644	0.00161161	0.0225047
Aldh5a1	NM_172532	-0.462532	3.63986	9.92465	0.0016308	0.0226964
Por	NM_008898	-0.248085	6.99835	9.88109	0.00166986	0.0231882
Mink1	NM_001045959	-0.239072	7.28905	9.87841	0.00167229	0.0231961
Rassf3	NM_138956	-0.297891	5.62067	9.85549	0.00169326	0.0234087
Xxylt1	NM_198626	-0.313039	5.46612	9.83294	0.00171414	0.0236188
Bcl9	NM_029933	-0.288794	6.42013	9.82412	0.00172238	0.023706
Lbh	NM_029999	-0.33532	5.68928	9.81895	0.00172723	0.0237466
Mapkbp1	NM_011941	-0.345473	5.04453	9.80052	0.00174462	0.0239592
Tfr2	NM_001289507	-0.240186	7.00239	9.79462	0.00175023	0.0240098
Pfkm	NM_001163487	-0.272738	6.39935	9.74388	0.0017992	0.0245733
Ppp2r5a	NM_144880	-0.250406	6.87644	9.73761	0.00180535	0.0246034
Vdr	NM_009504	-0.467867	4.44838	9.73239	0.00181049	0.0246195
Zfp92	NM_001310531	-1.17881	0.901175	9.7174	0.00182531	0.024794
Sgms1	NM_001168525	-0.305701	6.34783	9.70387	0.0018388	0.0249229
2018-09-03	NM_011889	-1.25224	-0.0794238	9.66664	0.00187644	0.0253641
Ubac2	NM_026861	-0.301238	5.6072	9.66011	0.00188313	0.025413
Arhgap26	NM_175164	-0.363991	4.80244	9.64565	0.001898	0.0255584
Mb21d2	NM_177718	-1.05951	1.69136	9.63599	0.00190802	0.0256655
Zfp608	NM_175751	-0.285389	7.66415	9.6123	0.00193278	0.0259706
Fcrla	NM_001160215	-2.03428	-0.0778893	9.59603	0.00194999	0.0261453
Ctsb	NM_007798	-0.28874	7.44834	9.5871	0.00195949	0.0262445
Ndrg3	NM_013865	-0.306487	6.02286	9.57735	0.00196993	0.0262995
Gm5141	NM_001256065	-0.522225	3.95285	9.54462	0.00200536	0.0266867
Pdxk	NM_172134	-0.280617	6.13288	9.51993	0.00203252	0.0270193
St14	NM_011176	-0.377219	4.91979	9.50344	0.00205087	0.0272052
Hoxb2	NM_134032	-0.708943	2.38573	9.49446	0.00206093	0.0273095
Zfp532	NM_207255	-0.526535	5.09065	9.48901	0.00206707	0.0273617
Vipr2	NM_009511	-0.421226	4.53966	9.46989	0.00208872	0.0275897
Spire1	NM_176832	-0.479022	4.00679	9.46356	0.00209594	0.0275972
Lurap1	NM_026547	-1.03505	1.28939	9.45855	0.00210167	0.0276143
Ermp1	NM_001081213	-0.257391	6.7782	9.40857	0.00215973	0.0282877
Dock4	NM_172803	-1.26642	-0.117284	9.40508	0.00216385	0.0283118
Wfdc17	NM_001081957	-0.941865	3.06011	9.40021	0.00216961	0.0283574
Glce	NM_033320	-0.335193	5.28267	9.3923	0.00217899	0.0284204
E2f5	NM_007892	-0.50332	3.56368	9.35464	0.00222421	0.0289194
Gm5111	NM_183309	-0.503163	3.93537	9.34064	0.00224127	0.0291108
Zdhhc2	NM_178395	-0.761612	2.18583	9.33786	0.00224468	0.0291247
Wbscr27	NM_024479	-0.452211	4.7763	9.31096	0.00227787	0.029469
Amot	NM_001290274	-0.366637	4.75051	9.30882	0.00228054	0.029469
Il10ra	NM_008348	-0.589762	4.48364	9.30038	0.00229107	0.029542
Rhoq	NM_145491	-0.344312	4.96976	9.29351	0.00229968	0.0296223
Rapgef4	NM_001204165	-0.610548	3.02673	9.2804	0.00231619	0.0298042
Pqlc3	NM_001161111	-0.364346	5.20419	9.27581	0.002322	0.0298482
Fzd3	NM_021458	-0.619192	3.75414	9.27043	0.00232884	0.0298743
Nfia	NM_001122952	-0.421181	4.76946	9.22878	0.0023824	0.0304673
Mtap	NM_024433	-0.268997	6.45577	9.21924	0.00239485	0.0305952
Myadm	NM_001093764	-0.330056	4.86956	9.21349	0.00240239	0.03066
Thy1	NM_009382	-0.668874	2.83012	9.20792	0.00240971	0.0307219
Nid2	NM_008695	-1.20087	0.448159	9.18681	0.00243765	0.0309636
Cyp2j9	NM_028979	-0.425798	4.96425	9.1861	0.00243861	0.0309636
Galc	NM_008079	-0.387476	4.97156	9.16004	0.00247357	0.0313117
Cx3cl1	NM_009142	-1.10164	1.72878	9.1562	0.00247877	0.0313457
Nlrp10	NM_175532	-0.660341	3.22529	9.12994	0.00251461	0.0317345
Eri2	NM_027698	-0.363938	4.39289	9.12462	0.00252192	0.0317755
1700040L02Rik	NM_028491	-0.610619	2.90132	9.08686	0.00257452	0.0323269
Mtfr2	NM_027930	-0.26177	6.51039	9.05619	0.00261807	0.0328347
Cabyr	NM_001042418	-0.815777	2.24791	9.01431	0.00267873	0.0334231
Fkbp5	NM_010220	-0.288631	7.17008	8.99504	0.00270714	0.0337201
Rfx2	NM_009056	-0.447085	4.07377	8.98195	0.00272659	0.0338946
Dync2li1	NM_172256	-0.560178	3.15569	8.97311	0.00273981	0.0340251
Dnah1	NM_001033668	-0.746833	2.5918	8.94145	0.00278771	0.0343799
Tmem246	NM_025944	-0.674442	2.59178	8.93261	0.00280123	0.0345125
Prom2	NM_138750	-1.81984	-0.727507	8.92528	0.0028125	0.0345829
Faxc	NM_175234	-1.13245	0.918356	8.90685	0.00284103	0.0348993
Rhbdl3	NM_139228	-0.866805	1.75951	8.89369	0.00286157	0.0350319
Map4k5	NM_201519	-0.315825	5.5282	8.89316	0.00286242	0.0350319
Tie1	NM_011587	-0.239505	7.15697	8.87874	0.00288511	0.0352323
St6gal1	NM_001252505	-0.937417	2.00684	8.85428	0.00292403	0.0356358
Fam169b	NM_001013811	-0.637128	3.3421	8.85259	0.00292674	0.0356358
Oxct1	NM_024188	-0.251078	7.75776	8.83966	0.00294754	0.035819
Myl12b	NM_023402	-0.222596	7.78583	8.83384	0.00295696	0.0358985
BC023829	NM_001033328	-0.356788	4.56528	8.81071	0.00299468	0.0362504
Klf12	NM_010636	-0.566949	3.83787	8.80653	0.00300155	0.0362983
Kcnip3	NM_001111331	-0.593582	3.07067	8.79459	0.00302124	0.0365011
Pdcd1lg2	NM_021396	-0.737313	2.95211	8.78957	0.00302958	0.0365663
Ank3	NM_009670	-1.2035	-0.205568	8.77966	0.00304608	0.0366944
Il18	NM_008360	-0.486375	3.85454	8.76221	0.00307536	0.03696
Adgrg2	NM_001079847	-1.06344	0.510755	8.76062	0.00307805	0.03696
Ptpra	NM_001163688	-0.233626	7.02075	8.73941	0.00311405	0.0372666
Rgl1	NM_016846	-0.328821	4.85368	8.73913	0.00311452	0.0372666
Ecscr	NM_001033141	-0.88428	1.55873	8.73089	0.00312864	0.0373996
Evc	NM_021292	-0.886499	1.71295	8.72285	0.00314247	0.0374929
Wdfy2	NM_175546	-0.328525	4.7227	8.71939	0.00314843	0.0375281
Tmem154	NM_177260	-0.419091	4.1942	8.69688	0.00318755	0.037958
Bco2	NM_133217	-0.880938	1.73286	8.6777	0.00322127	0.0382863
Nwd1	NM_001159403	-0.331909	7.27918	8.67425	0.00322737	0.0383224
Tbc1d16	NM_172443	-0.287219	5.92316	8.66285	0.00324763	0.0385262
Cacnb2	NM_001252533	-0.37312	4.4535	8.66096	0.003251	0.0385295
Usp44	NM_001206851	-0.924144	1.15617	8.6488	0.00327277	0.0387506
Slc9b2	NM_178877	-0.790704	1.91034	8.64437	0.00328073	0.0387732
Snx31	NM_025712	-0.917229	1.57334	8.64427	0.00328091	0.0387732
2410004P03Rik	NM_001201332	-1.04332	0.986693	8.63208	0.00330294	0.0389886
Lactb2	NM_145381	-0.378299	4.3066	8.63073	0.00330539	0.0389886
Depdc7	NM_144804	-1.05972	0.405207	8.57173	0.00341422	0.0401961
Slc18b1	NM_183116	-0.623269	2.73095	8.55096	0.0034534	0.0405425
Snap47	NM_144521	-0.405114	3.83841	8.5343	0.00348516	0.0407617
Cacna1h	NM_001163691	-1.41723	0.849436	8.52453	0.00350391	0.0409425
2018-03-01	NM_001166372	-1.252	0.253817	8.50408	0.0035435	0.0413501
Slc37a2	NM_001145960	-1.10128	0.296407	8.50309	0.00354543	0.0413501
Kcnk6	NM_001033525	-0.815688	1.88879	8.47445	0.0036017	0.0419279
Rab13	NM_001293741	-0.947039	1.3013	8.46285	0.00362474	0.0421125
Adgrl4	NM_133222	-0.304811	9.98492	8.45822	0.00363397	0.042146
Dock3	NM_153413	-0.811573	2.41474	8.45546	0.0036395	0.0421708
Hoxa5	NM_010453	-0.371968	4.71225	8.40166	0.00374879	0.0433162
Gm13986	NR_126479	-1.11782	1.07251	8.35475	0.0038468	0.0440909
Krt8	NM_031170	-1.29431	0.0542531	8.34483	0.00386785	0.0442812
Gstt1	NM_008185	-0.802028	1.83484	8.32631	0.00390749	0.0446939
Cc2d2a	NM_172274	-0.414324	3.84901	8.31912	0.003923	0.0447891
Alcam	NM_009655	-0.367976	6.29738	8.29676	0.00397159	0.0452195
B4galt6	NM_019737	-0.319518	5.93597	8.28849	0.00398972	0.0453557
Slc9a9	NM_177909	-0.395317	4.16008	8.28798	0.00399084	0.0453557
Hoxb5os	NR_131758	-1.18368	0.362428	8.26963	0.00403137	0.0457746
Ociad2	NM_001310636	-0.343116	4.51163	8.26726	0.00403665	0.045789
Naprt	NM_172607	-0.4221	4.17629	8.26575	0.00403999	0.045789
Dlc1	NM_001194940	-1.13435	-0.0217008	8.26154	0.00404937	0.0458536
Rec8	NM_020002	-0.381885	5.1064	8.25663	0.00406034	0.0459361
Neurl3	NM_153408	-0.291696	6.48598	8.22511	0.00413147	0.046656
Hoxb5	NM_008268	-1.08221	1.231	8.21884	0.00414576	0.0467117
Creb3l1	NM_011957	-1.27815	-0.29886	8.21802	0.00414765	0.0467117
Chn1	NM_001113246	-1.34097	-0.424384	8.21096	0.0041638	0.0468512
Sulf2	NM_001252578	-0.782173	1.84603	8.20842	0.00416964	0.0468746
Epcam	NM_008532	-1.11615	1.10357	8.20076	0.00418728	0.0469722
Cdcp1	NM_133974	-0.523379	4.079	8.19969	0.00418976	0.0469722
Pirb	NM_011095	-0.758739	2.13586	8.19811	0.0041934	0.0469722
Ydjc	NM_026940	-0.46835	4.21957	8.19488	0.00420089	0.0470137
Nav2	NM_001111016	-0.356826	4.78316	8.18428	0.00422549	0.0472466
Bach2	NM_001109661	-0.348767	4.55561	8.17414	0.00424919	0.0474265
Tnks1bp1	NM_001081260	-0.412031	5.05495	8.14342	0.00432178	0.0481073
Gprin3	NM_183183	-0.897932	1.23964	8.07058	0.00449896	0.0497683
Kras	NM_021284	-0.232017	6.44952	8.06745	0.00450674	0.0497766
Tcam1	NM_029467	-0.437499	3.74371	8.06707	0.00450771	0.0497766

[truncated: 12 more sheets: ST10, ST11, ST12, ST13, ST14, ST15, ST16, ST17, ST18, ST19, ST20, ST21]
